# Supplementary material for: Theoretical investigation on donor–acceptor interaction between a carbonyl compound and an N,N′-dioxide–Sc(iii) complex
Source: Royal Society of Chemistry journal article supplement (doi:10.1039/c7ra12258f), 2017-01-01
Supplement: c7ra12258f1.pdf [file c7ra12258f1.pdf]

## Theoretical Investigation on Donor-acceptor Interaction between Carbonyl Compound and *N, N'*-dioxide-Sc(III) Complex

Zhishan Su, Weiying He, Junming Wang, Yini Zuo, and Changwei Hu\*

*Key Laboratory of Green Chemistry and Technology, Ministry of Education, College of Chemistry, Sichuan University, Chengdu, Sichuan, 610064 (P.R. China)*

Email: changwei.hu@scu.edu.cn

### Supporting Information

#### CONTENTS

|                                                                                                                                                                                                                                                                                                                                                                                                                                    |   |
|------------------------------------------------------------------------------------------------------------------------------------------------------------------------------------------------------------------------------------------------------------------------------------------------------------------------------------------------------------------------------------------------------------------------------------|---|
| <b>Figure S1</b> Optimized geometries of hexacoordinate complexes L1-Sc(III)-OTf, L2-Sc(III)-OTf and L3-Sc(III)-OTf, respectively. ....                                                                                                                                                                                                                                                                                            | 3 |
| <b>Table S1</b> Variation of selected parameters for L1-CH <sub>2</sub> O-OTf as increasing distance between CH <sub>2</sub> O and catalyst. ....                                                                                                                                                                                                                                                                                  | 4 |
| <b>Table S2</b> Variation of selected parameters for L2-CH <sub>2</sub> O-OTf as increasing distance between CH <sub>2</sub> O and catalyst. ....                                                                                                                                                                                                                                                                                  | 5 |
| <b>Table S3</b> Variation of selected parameters for L3-CH <sub>2</sub> O-OTf as increasing distance between CH <sub>2</sub> O and catalyst. ....                                                                                                                                                                                                                                                                                  | 5 |
| <b>Figure S3</b> Dominating contributions to the deformation density $\Delta\rho$ describing the coordination interaction between CH <sub>2</sub> O and scandium-based fragments for L1-CH <sub>2</sub> O-OTf (a) and L2-CH <sub>2</sub> O-OTf (b) complexes according to EST-NOCV analysis. The contour value is $ \Delta\rho =0.001$ a. u. The blue/red contours corresponds to accumulation/depletion of electron density. .... | 6 |
| <b>Table S.</b> Molecule Orbitals (MO) composition and the corresponding contribution of fragments orbitals (FO) involving donor-acceptor interaction between CH <sub>2</sub> O (Frag. 1) and L-Sc(III)(counterion) (Frag. 2), as well as electronic density transfer from CH <sub>2</sub> O to L-Sc(III)(counterion) fragment (1->2) by CDA calculations in hexacoordinate complexes. ....                                        | 6 |
| <b>Figure S4</b> Results of CDA analysis and the corresponding molecule orbitals interaction between CH <sub>2</sub> O and L3-[ScOTf] <sup>2+</sup> in L3-CH <sub>2</sub> O complex. ....                                                                                                                                                                                                                                          | 7 |
| <b>Figure S5</b> Charge density ( $\rho$ ) and Laplacian ( $\nabla^2\rho$ ) of selected bond critical points for L3-CH <sub>2</sub> O-OTf obtained by AIM theory and visualized by Multiwfn program package. ....                                                                                                                                                                                                                  | 7 |
| <b>Table S5</b> Comparison of selected parameters for hexacoordinate complexes with different substituent in ligand(Cy, Ph or 2,6-iPr), carbonyl substrates(CH <sub>2</sub> O, PhCHO or Chalcone) and counterion(OTf or O <i>i</i> Pr), respectively. ....                                                                                                                                                                         | 8 |

|                                                                                                                                   |   |
|-----------------------------------------------------------------------------------------------------------------------------------|---|
| <b>Table S6</b> Results of ETS-NOCV calculations for hexacoordinate complexes. The energies are in kcal mol <sup>-1</sup> . ..... | 8 |
| <b>Cartesian coordinates of all stationary points</b> .....                                                                       | 9 |

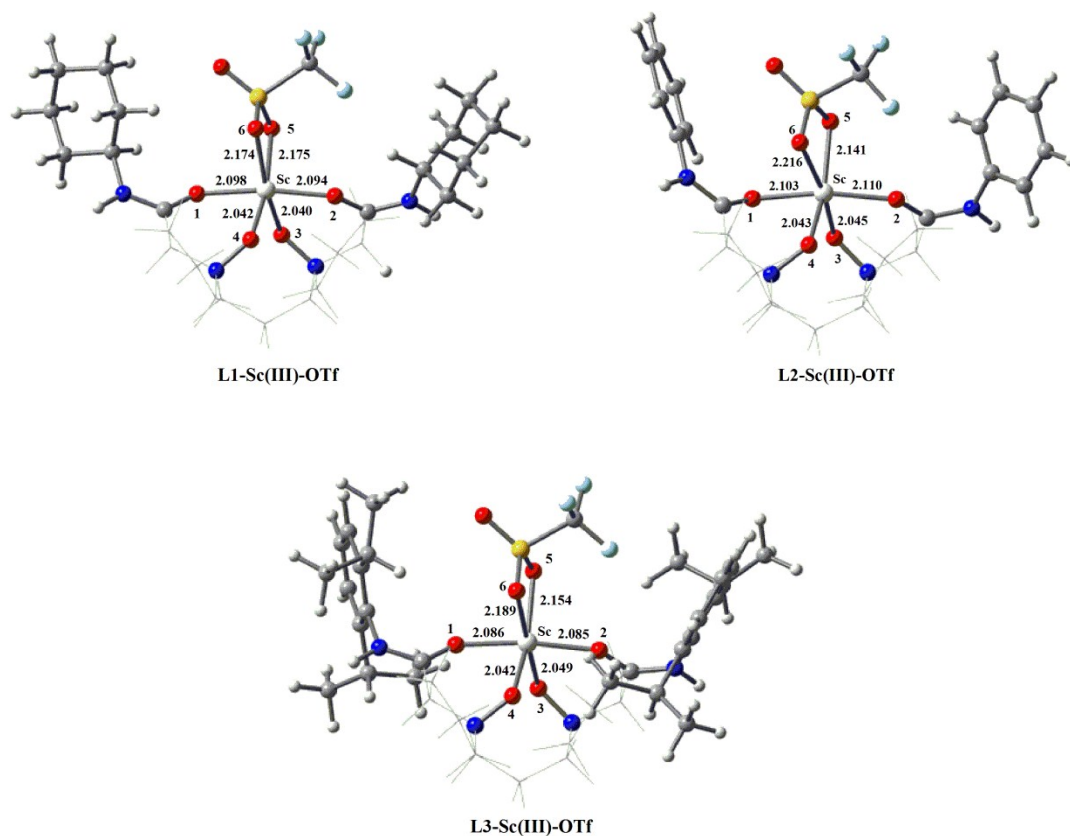

**Figure S1** Optimized geometries of hexacoordinate complexes L1-Sc(III)-OTf, L2-Sc(III)-OTf and L3-Sc(III)-OTf, respectively.

**Table S1** Variation of selected parameters for L1-CH<sub>2</sub>O-OTf as increasing distance between CH<sub>2</sub>O and catalyst.

| No. | R <sub>O8...Sc</sub><br>(Å) | WIB<br>O8...Sc | WIB<br>C5=O8 | ν <sub>C=O</sub><br>(cm <sup>-1</sup> ) | Charge |                   |        | ΔE <sub>int</sub><br>(kcal<br>mol <sup>-1</sup> ) | ΔE <sub>strain</sub> (kcal mol <sup>-1</sup> ) |                   |      | ΔE <sub>r</sub><br>(kcal<br>mol <sup>-1</sup> ) |
|-----|-----------------------------|----------------|--------------|-----------------------------------------|--------|-------------------|--------|---------------------------------------------------|------------------------------------------------|-------------------|------|-------------------------------------------------|
|     |                             |                |              |                                         | Sc     | CH <sub>2</sub> O | ligand |                                                   | CA<br>T                                        | CH <sub>2</sub> O | Sum  |                                                 |
| 1   | 2.176                       | 0.311          | 1.654        | 1765.2                                  | 1.600  | 0.147             | 0.906  | -39.2                                             | 16.3                                           | 0.7               | 17.0 | -22.3                                           |
| 2   | 2.226                       | 0.300          | 1.668        | 1766.9                                  | 1.612  | 0.144             | 0.902  | -39.0                                             | 16.3                                           | 0.7               | 17.0 | -22.0                                           |
| 3   | 2.276                       | 0.287          | 1.687        | 1775.8                                  | 1.621  | 0.143             | 0.899  | -38.1                                             | 15.8                                           | 0.6               | 16.4 | -21.7                                           |
| 4   | 2.326                       | 0.275          | 1.703        | 1782.0                                  | 1.631  | 0.142             | 0.894  | -37.0                                             | 15.4                                           | 0.5               | 15.9 | -21.1                                           |
| 5   | 2.376                       | 0.264          | 1.716        | 1785.9                                  | 1.640  | 0.138             | 0.891  | -35.9                                             | 15.1                                           | 0.4               | 15.5 | -20.4                                           |
| 6   | 2.426                       | 0.252          | 1.729        | 1788.3                                  | 1.649  | 0.135             | 0.887  | -34.8                                             | 14.8                                           | 0.4               | 15.2 | -19.6                                           |
| 7   | 2.476                       | 0.242          | 1.740        | 1791.5                                  | 1.660  | 0.131             | 0.882  | -33.6                                             | 14.6                                           | 0.4               | 15.0 | -18.6                                           |
| 8   | 2.526                       | 0.231          | 1.756        | 1795.4                                  | 1.669  | 0.130             | 0.877  | -32.3                                             | 14.3                                           | 0.3               | 14.6 | -17.1                                           |
| 9   | 2.576                       | 0.221          | 1.764        | 1797.3                                  | 1.679  | 0.126             | 0.873  | -31.0                                             | 14.1                                           | 0.3               | 14.4 | -16.6                                           |
| 10  | 2.626                       | 0.212          | 1.772        | 1799.0                                  | 1.689  | 0.121             | 0.869  | -29.8                                             | 13.9                                           | 0.3               | 14.2 | -15.6                                           |
| 11  | 2.676                       | 0.203          | 1.779        | 1801.1                                  | 1.699  | 0.117             | 0.865  | -28.6                                             | 13.8                                           | 0.3               | 14.1 | -14.5                                           |
| 12  | 2.726                       | 0.194          | 1.785        | 1803.1                                  | 1.707  | 0.112             | 0.862  | 27.4                                              | 13.6                                           | 0.2               | 13.8 | -13.6                                           |

**Table S2** Variation of selected parameters for L2-CH<sub>2</sub>O-OTf as increasing distance between CH<sub>2</sub>O and catalyst.

| No. | R <sub>O8...Sc</sub><br>(Å) | WIB<br>O8...Sc | WIB<br>C5=O8 | ν <sub>C=O</sub><br>(cm <sup>-1</sup> ) | Charge |                   |        | ΔE <sub>int</sub><br>(kcal<br>mol <sup>-1</sup> ) | ΔE <sub>strain</sub> (kcal mol <sup>-1</sup> ) |                   |      | ΔE <sub>r</sub><br>(kcal<br>mol <sup>-1</sup> ) |
|-----|-----------------------------|----------------|--------------|-----------------------------------------|--------|-------------------|--------|---------------------------------------------------|------------------------------------------------|-------------------|------|-------------------------------------------------|
|     |                             |                |              |                                         | Sc     | CH <sub>2</sub> O | ligand |                                                   | C <sub>A</sub><br>T                            | CH <sub>2</sub> O | Sum  |                                                 |
| 1   | 2.167                       | 0.317          | 1.640        | 1750.2                                  | 1.598  | 0.148             | 0.909  | -42.4                                             | 15.0                                           | 0.8               | 15.8 | -26.6                                           |
| 2   | 2.217                       | 0.303          | 1.660        | 1756.8                                  | 1.606  | 0.146             | 0.907  | -41.7                                             | 14.5                                           | 0.7               | 15.2 | -26.5                                           |
| 3   | 2.267                       | 0.291          | 1.675        | 1765.4                                  | 1.615  | 0.143             | 0.905  | -40.9                                             | 14.2                                           | 0.6               | 14.8 | -26.1                                           |
| 4   | 2.317                       | 0.280          | 1.690        | 1770.4                                  | 1.625  | 0.140             | 0.901  | -39.9                                             | 13.9                                           | 0.6               | 14.4 | -25.5                                           |
| 5   | 2.367                       | 0.269          | 1.704        | 1774.4                                  | 1.635  | 0.137             | 0.898  | -38.8                                             | 13.6                                           | 0.5               | 14.1 | -24.7                                           |
| 6   | 2.416                       | 0.258          | 1.716        | 1779.0                                  | 1.644  | 0.134             | 0.894  | -37.6                                             | 13.3                                           | 0.5               | 13.8 | -23.8                                           |
| 7   | 2.467                       | 0.248          | 1.728        | 1783.6                                  | 1.654  | 0.131             | 0.889  | -36.3                                             | 13.1                                           | 0.4               | 13.5 | -22.9                                           |
| 8   | 2.516                       | 0.237          | 1.741        | 1788.4                                  | 1.664  | 0.129             | 0.885  | -35.0                                             | 12.8                                           | 0.4               | 13.2 | -21.8                                           |
| 9   | 2.567                       | 0.227          | 1.755        | 1793.6                                  | 1.674  | 0.127             | 0.880  | -33.6                                             | 12.5                                           | 0.3               | 12.9 | -20.7                                           |
| 10  | 2.617                       | 0.218          | 1.765        | 1795.9                                  | 1.684  | 0.124             | 0.875  | -32.3                                             | 12.3                                           | 0.3               | 12.6 | -19.7                                           |
| 11  | 2.667                       | 0.208          | 1.773        | 1798.0                                  | 1.694  | 0.119             | 0.871  | -31.0                                             | 12.1                                           | 0.3               | 12.4 | -18.6                                           |
| 12  | 2.717                       | 0.200          | 1.781        | 1799.9                                  | 1.704  | 0.116             | 0.866  | -29.7                                             | 11.9                                           | 0.3               | 12.2 | -17.6                                           |
| 13  | 2.767                       | 0.191          | 1.787        | 1802.1                                  | 1.713  | 0.111             | 0.863  | -28.5                                             | 11.8                                           | 0.3               | 12.1 | -16.5                                           |

**Table S3** Variation of selected parameters for L3-CH<sub>2</sub>O-OTf as increasing distance between CH<sub>2</sub>O and catalyst.

| No. | R <sub>O8...Sc</sub><br>(Å) | WIB<br>O8...Sc | WIB<br>C5=O8 | ν <sub>C=O</sub><br>(cm <sup>-1</sup> ) | Charge |                   |        | ΔE <sub>int</sub><br>(kcal<br>mol <sup>-1</sup> ) | ΔE <sub>strain</sub> (kcal mol <sup>-1</sup> ) |                   |      | ΔE <sub>r</sub><br>(kcal<br>mol <sup>-1</sup> ) |
|-----|-----------------------------|----------------|--------------|-----------------------------------------|--------|-------------------|--------|---------------------------------------------------|------------------------------------------------|-------------------|------|-------------------------------------------------|
|     |                             |                |              |                                         | Sc     | CH <sub>2</sub> O | ligand |                                                   | C <sub>A</sub><br>T                            | CH <sub>2</sub> O | Sum  |                                                 |
| 1   | 2.166                       | 0.280          | 1.635        | 1747.0                                  | 1.647  | 0.132             | 0.863  | -43.6                                             | 19.1                                           | 0.8               | 20.0 | -23.6                                           |
| 2   | 2.216                       | 0.268          | 1.654        | 1753.0                                  | 1.656  | 0.132             | 0.860  | -42.9                                             | 18.7                                           | 0.7               | 19.4 | -23.5                                           |
| 3   | 2.266                       | 0.257          | 1.672        | 1758.1                                  | 1.666  | 0.131             | 0.855  | -42.1                                             | 18.3                                           | 0.7               | 19.0 | -23.1                                           |
| 4   | 2.316                       | 0.246          | 1.691        | 1765.4                                  | 1.675  | 0.132             | 0.850  | -41.0                                             | 17.9                                           | 0.6               | 18.5 | -22.5                                           |
| 5   | 2.366                       | 0.236          | 1.705        | 1768.2                                  | 1.687  | 0.130             | 0.844  | -39.8                                             | 17.5                                           | 0.5               | 18.1 | -21.8                                           |
| 6   | 2.416                       | 0.227          | 1.717        | 1771.5                                  | 1.698  | 0.128             | 0.838  | -38.7                                             | 17.2                                           | 0.5               | 17.7 | -20.9                                           |
| 7   | 2.466                       | 0.219          | 1.729        | 1774.3                                  | 1.708  | 0.126             | 0.833  | -37.5                                             | 17.0                                           | 0.5               | 17.5 | -20.0                                           |

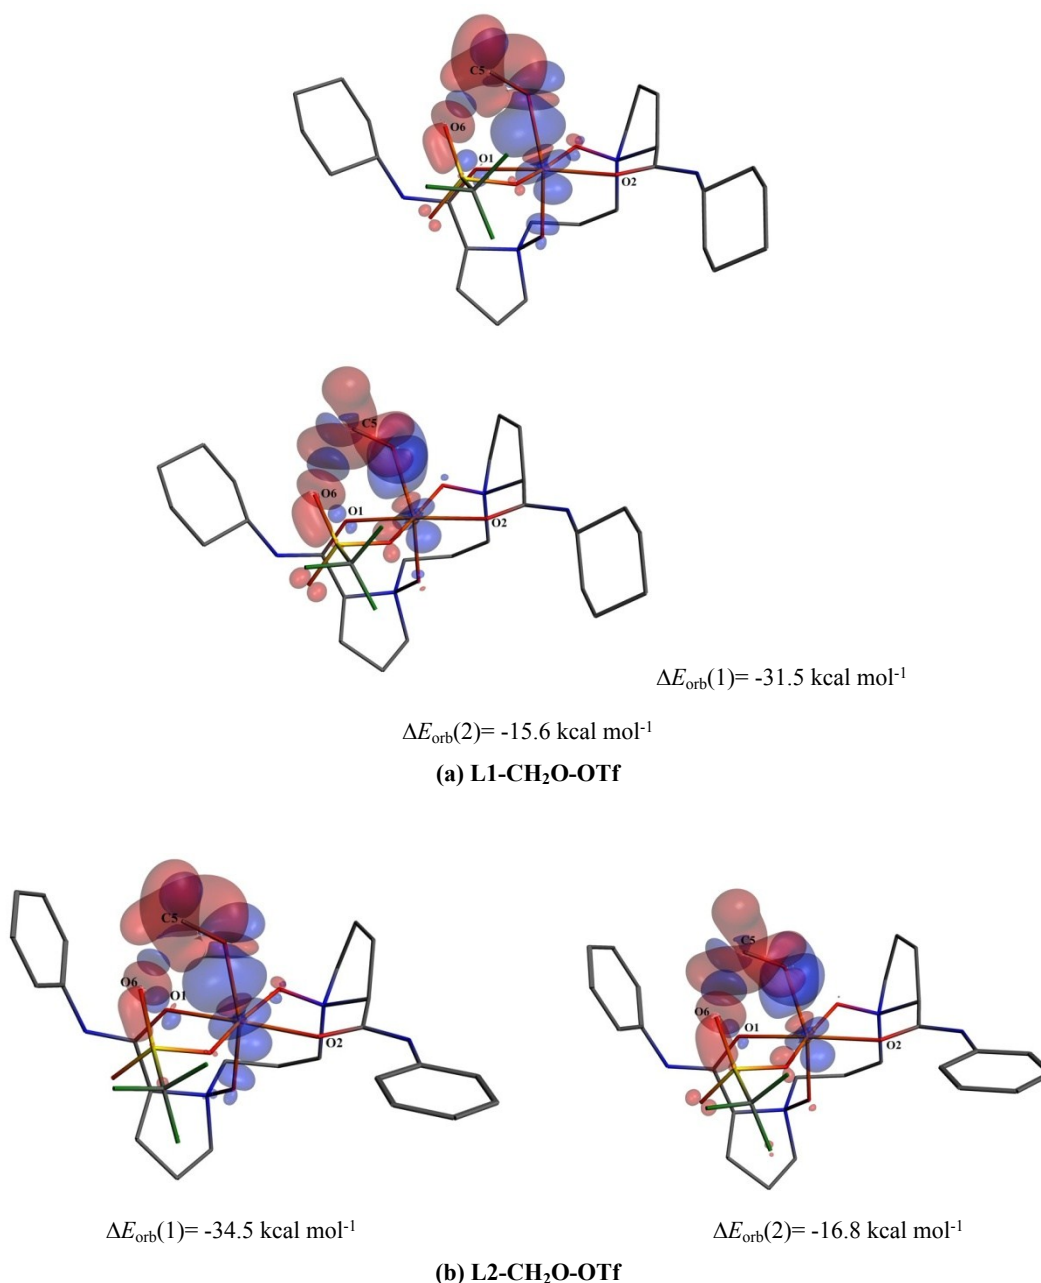

**Figure S2** Dominating contributions to the deformation density  $\Delta\rho$  describing the coordination interaction between CH<sub>2</sub>O and scandium-based fragments for L1-CH<sub>2</sub>O-OTf (a) and L2-CH<sub>2</sub>O-OTf (b) complexes according to EST-NOCV analysis. The contour value is  $|\Delta\rho|=0.001$  a. u. The blue/red contours corresponds to accumulation/depletion of electron density.

**Table S4** Molecule Orbitals (MO) composition and the corresponding contribution of fragments orbitals (FO) involving donor-acceptor interaction between CH<sub>2</sub>O (Frag. 1) and L-Sc(III)(counterion) (Frag. 2), as well as electronic density transfer from CH<sub>2</sub>O to L-Sc(III)(counterion) fragment (1→2) by CDA calculations in hexacoordinate complexes.

| Ligand | Counter - ion | CDA (1→2) | MO       | FO                          |                                      |               |                |
|--------|---------------|-----------|----------|-----------------------------|--------------------------------------|---------------|----------------|
|        |               |           |          | CH <sub>2</sub> O (Frag. 1) | Ligand-Sc(III)(counterion) (Frag. 2) |               |                |
| L1     | OTf           | 0.635     | HOMO-117 | HOFO-5 (75.7%)              | LUFO-2 (2.6%)                        | LUFO-3 (4.4%) | LUFO-6 (2.4%)  |
| L2     | OTf           | 1.223     | HOMO-110 | HOFO-5 (70.8%)              | LUFO-2 (3.6%)                        | LUFO-3 (4.1%) | LUFO-6 (3.2%)  |
| L3     | OTf           | 1.379     | HOMO-146 | HOFO-5 (66.4%)              | LUFO-2 (3.3%)                        | LUFO-3 (5.8%) | LUFO-26 (4.1%) |

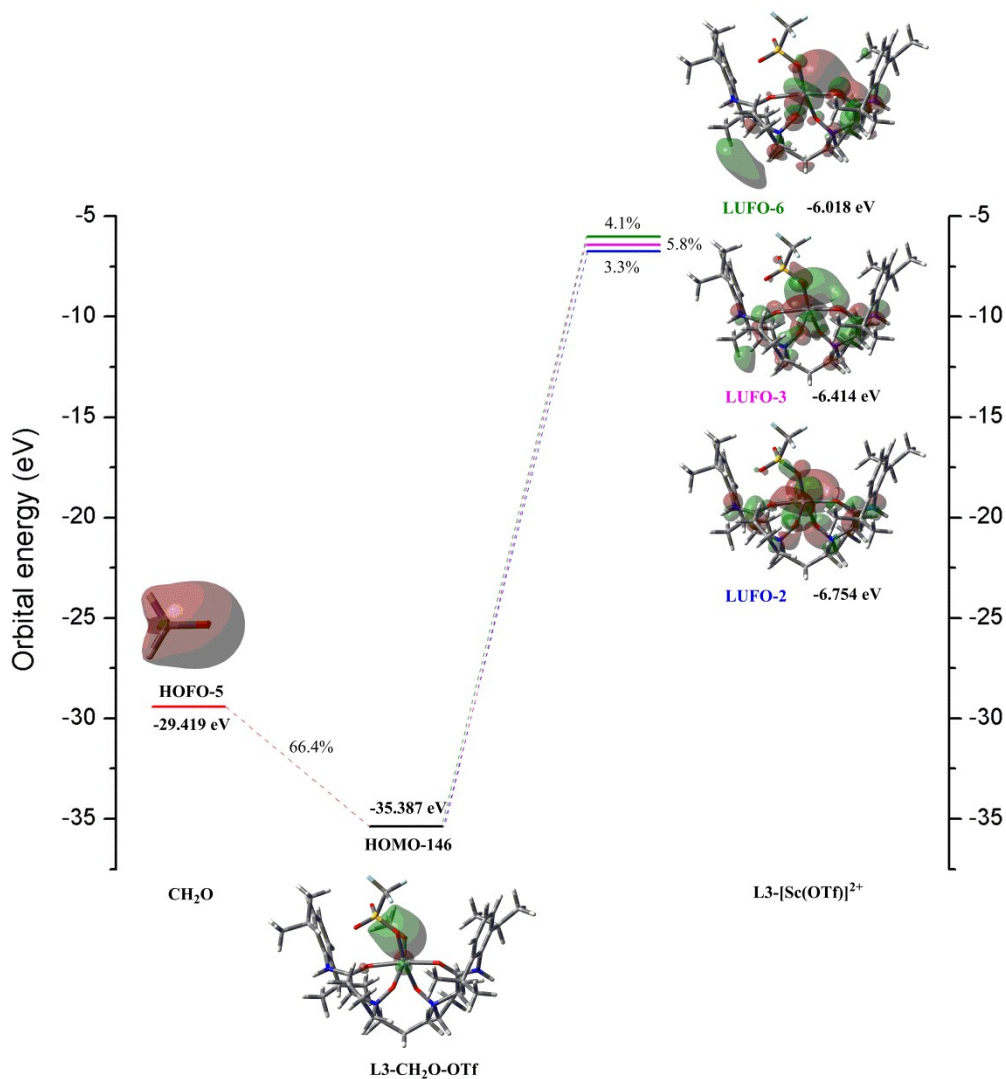

**Figure S3** Results of CDA analysis and the corresponding molecule orbitals interaction between CH<sub>2</sub>O and L3-[Sc(OTf)]<sup>2+</sup> in L3-CH<sub>2</sub>O-OTf complex.

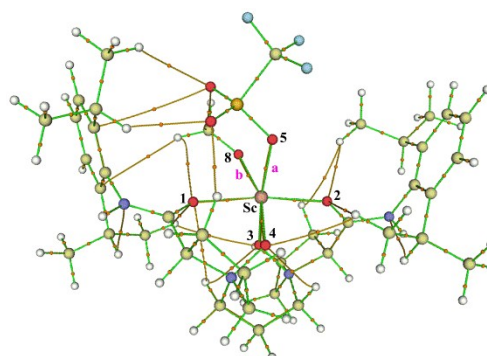

**L3-CH<sub>2</sub>O-OTf**  
 $\rho_a = 0.727$   $\nabla^2\rho_a = 0.388$   
 $\rho_b = 0.054$   $\nabla^2\rho_b = 0.285$

**Figure S4** Charge density ( $\rho$ ) and Laplacian ( $\nabla^2\rho$ ) of selected bond critical points for L3-CH<sub>2</sub>O-OTf obtained by AIM theory and visualized by Multiwfn program package.

**Table S5** Comparison of selected parameters for hexacoordinate complexes with different substituent in ligand(Cy, Ph or 2,6-*i*Pr), carbonyl substrates(CH<sub>2</sub>O, PhCHO or Chalcone) and counterion(OTf or *Oi*Pr), respectively.

| Ligand | Substi<br>-tuent | Counter<br>-ion | Carbonyl<br>substrate | R (Å) | R <sub>O8...Sc</sub><br>(Å) | WIB<br>(O8-Sc) | $\Delta\nu_{C=O}$<br>(cm <sup>-1</sup> ) | Charge |                   |        |
|--------|------------------|-----------------|-----------------------|-------|-----------------------------|----------------|------------------------------------------|--------|-------------------|--------|
|        |                  |                 |                       |       |                             |                |                                          | Sc     | CH <sub>2</sub> O | ligand |
| L1     | Cy               | OTf             | CH <sub>2</sub> O     | 2.052 | 2.176                       | 0.311          | 99.6                                     | 1.600  | 0.147             | 0.906  |
| L2     | Ph               | OTf             | CH <sub>2</sub> O     | 2.052 | 2.167                       | 0.317          | 114.6                                    | 1.598  | 0.148             | 0.909  |
| L3     | 2,6- <i>i</i> Pr | OTf             | CH <sub>2</sub> O     | 2.058 | 2.166                       | 0.280          | 117.8                                    | 1.647  | 0.132             | 0.863  |
| L3     | 2,6- <i>i</i> Pr | <i>Oi</i> Pr    | CH <sub>2</sub> O     | 1.862 | 2.259                       | 0.192          | 69.3                                     | 1.731  | 0.137             | 0.726  |
| L3     | 2,6- <i>i</i> Pr | OTf             | PhCHO                 | 2.047 | 2.114                       | 0.296          | 149.3                                    | 1.663  | 0.173             | 0.829  |
| L3     | 2,6- <i>i</i> Pr | OTf             | Chalcone              | 2.058 | 2.058                       | 0.280          | 200.5                                    | 1.710  | 0.201             | 0.771  |

### Cartesian coordinates of all stationary points

#### [Sc(OTf)]<sup>2+</sup>

Zero-point correction= 0.02838 (a.u.)

Thermal correction to Gibbs Free Energy= -0.00925 (a.u.)

Sum of electronic and zero-point Energies= -1721.16036 (a.u.)

Sum of electronic and thermal Free Energies= -1721.19799 (a.u.)

Standard orientation:

| Center<br>Number | Atomic<br>Number | Atomic<br>Type | Coordinates (Angstroms) |           |           |
|------------------|------------------|----------------|-------------------------|-----------|-----------|
|                  |                  |                | X                       | Y         | Z         |
| 1                | 21               | 0              | -2.338280               | -0.538611 | -0.000024 |
| 2                | 16               | 0              | -0.018491               | 0.705373  | 0.000026  |
| 3                | 8                | 0              | 0.129481                | 2.120605  | -0.000345 |
| 4                | 8                | 0              | -0.985518               | 0.104446  | -1.154412 |
| 5                | 8                | 0              | -0.986171               | 0.105255  | 1.154530  |
| 6                | 6                | 0              | 1.759654                | -0.435383 | 0.000096  |

|   |   |   |          |           |           |
|---|---|---|----------|-----------|-----------|
| 7 | 9 | 0 | 2.321420 | -0.069051 | -1.081735 |
| 8 | 9 | 0 | 2.323192 | -0.066837 | 1.080222  |
| 9 | 9 | 0 | 1.308663 | -1.642478 | 0.001658  |

**L1**

Zero-point correction= 0.68921 (a.u.)

Thermal correction to Gibbs Free Energy= 0.62458 (a.u.)

Sum of electronic and zero-point Energies= -1497.38179 (a.u.)

Sum of electronic and thermal Free Energies= -1497.44641 (a.u.)

Standard orientation:

| Center<br>Number | Atomic<br>Number | Atomic<br>Type | Coordinates (Angstroms) |           |           |
|------------------|------------------|----------------|-------------------------|-----------|-----------|
|                  |                  |                | X                       | Y         | Z         |
| 1                | 8                | 0              | -3.735216               | -2.245508 | -1.730724 |
| 2                | 8                | 0              | -2.708782               | -0.669604 | 2.014462  |
| 3                | 7                | 0              | -4.307304               | -0.671746 | -0.170742 |
| 4                | 1                | 0              | -4.011180               | -0.335518 | 0.757739  |
| 5                | 7                | 0              | -1.945510               | -1.555845 | 1.324015  |
| 6                | 6                | 0              | -5.097098               | 0.160623  | -1.062622 |
| 7                | 6                | 0              | -3.650999               | -1.762951 | -0.604656 |
| 8                | 6                | 0              | -2.780674               | -2.469050 | 0.428157  |
| 9                | 1                | 0              | -2.065268               | -3.070844 | -0.148409 |
| 10               | 6                | 0              | -0.897329               | -0.848486 | 0.514199  |
| 11               | 1                | 0              | -1.458001               | -0.232550 | -0.202205 |
| 12               | 1                | 0              | -0.328341               | -1.604421 | -0.045982 |
| 13               | 1                | 0              | -0.641375               | 0.621455  | 2.022662  |
| 14               | 8                | 0              | 3.735553                | 2.242675  | -1.736513 |
| 15               | 8                | 0              | 2.710644                | 0.674726  | 2.012313  |
| 16               | 7                | 0              | 4.308121                | 0.671746  | -0.173817 |
| 17               | 1                | 0              | 4.012801                | 0.337791  | 0.755683  |
| 18               | 7                | 0              | 1.947899                | 1.560481  | 1.320728  |
| 19               | 6                | 0              | 3.652338                | 1.762662  | -0.609275 |
| 20               | 6                | 0              | 0.898622                | 0.852950  | 0.512430  |
| 21               | 1                | 0              | 1.458339                | 0.235421  | -0.203317 |
| 22               | 1                | 0              | 0.330203                | 1.608669  | -0.048591 |
| 23               | 1                | 0              | 0.642328                | -0.613381 | 2.024085  |
| 24               | 6                | 0              | 0.000467                | 0.003290  | 1.382149  |
| 25               | 6                | 0              | 5.095973                | -0.163801 | -1.064543 |
| 26               | 6                | 0              | -1.362523               | -2.560118 | 2.284897  |
| 27               | 1                | 0              | -0.962541               | -1.997057 | 3.129828  |
| 28               | 1                | 0              | -0.551171               | -3.095443 | 1.772420  |
| 29               | 6                | 0              | -2.538758               | -3.467526 | 2.626245  |



|    |   |   |           |           |           |
|----|---|---|-----------|-----------|-----------|
| 30 | 1 | 0 | -3.016014 | -3.136791 | 3.552306  |
| 31 | 1 | 0 | -2.197526 | -4.497111 | 2.773528  |
| 32 | 6 | 0 | -3.516441 | -3.337182 | 1.439366  |
| 33 | 1 | 0 | -3.781231 | -4.297606 | 0.987726  |
| 34 | 1 | 0 | -4.441418 | -2.842825 | 1.750752  |
| 35 | 6 | 0 | 2.543834  | 3.473215  | 2.619922  |
| 36 | 1 | 0 | 3.021176  | 3.142723  | 3.546034  |
| 37 | 1 | 0 | 2.203969  | 4.503362  | 2.766389  |
| 38 | 6 | 0 | 3.520709  | 3.340382  | 1.432668  |
| 39 | 1 | 0 | 3.786107  | 4.299934  | 0.979540  |
| 40 | 1 | 0 | 4.445430  | 2.845715  | 1.744284  |
| 41 | 6 | 0 | 1.366308  | 2.566933  | 2.280157  |
| 42 | 1 | 0 | 0.965607  | 2.005835  | 3.126054  |
| 43 | 1 | 0 | 0.555646  | 3.102689  | 1.767019  |
| 44 | 6 | 0 | 2.783598  | 2.471469  | 0.423068  |
| 45 | 1 | 0 | 2.068555  | 3.073202  | -0.153995 |
| 46 | 6 | 0 | -4.220656 | 1.178449  | -1.792770 |
| 47 | 1 | 0 | -3.451829 | 0.646929  | -2.370297 |
| 48 | 1 | 0 | -3.697156 | 1.786610  | -1.033903 |
| 49 | 6 | 0 | -6.200614 | 0.856514  | -0.276583 |
| 50 | 1 | 0 | -5.737248 | 1.460603  | 0.522697  |
| 51 | 1 | 0 | -6.828736 | 0.105243  | 0.219903  |
| 52 | 6 | 0 | -7.034258 | 1.761291  | -1.176859 |
| 53 | 1 | 0 | -7.809751 | 2.268612  | -0.588819 |
| 54 | 1 | 0 | -7.562147 | 1.143137  | -1.920993 |
| 55 | 6 | 0 | -6.158932 | 2.777341  | -1.903507 |
| 56 | 1 | 0 | -5.701397 | 3.455089  | -1.164106 |
| 57 | 1 | 0 | -6.769544 | 3.404702  | -2.565935 |
| 58 | 6 | 0 | -5.055404 | 2.081607  | -2.693396 |
| 59 | 1 | 0 | -4.413561 | 2.817954  | -3.193947 |
| 60 | 1 | 0 | -5.508982 | 1.471813  | -3.491362 |
| 61 | 6 | 0 | 6.198229  | -0.860133 | -0.277204 |
| 62 | 1 | 0 | 5.733788  | -1.461247 | 0.523697  |
| 63 | 1 | 0 | 6.828073  | -0.108980 | 0.217283  |
| 64 | 6 | 0 | 7.029780  | -1.768934 | -1.175386 |
| 65 | 1 | 0 | 7.804238  | -2.276392 | -0.586107 |
| 66 | 1 | 0 | 7.558969  | -1.153819 | -1.921130 |
| 67 | 6 | 0 | 6.152119  | -2.784865 | -1.899418 |
| 68 | 1 | 0 | 5.693225  | -3.459689 | -1.158193 |
| 69 | 1 | 0 | 6.761232  | -3.415270 | -2.560344 |
| 70 | 6 | 0 | 5.049763  | -2.088819 | -2.690754 |
| 71 | 1 | 0 | 5.504374  | -1.482241 | -3.490587 |
| 72 | 1 | 0 | 4.406023  | -2.825020 | -3.189083 |
| 73 | 6 | 0 | 4.217286  | -1.181532 | -1.792135 |

|    |   |   |           |           |           |
|----|---|---|-----------|-----------|-----------|
| 74 | 1 | 0 | 3.449390  | -0.649806 | -2.370633 |
| 75 | 1 | 0 | 3.692839  | -1.786680 | -1.031502 |
| 76 | 1 | 0 | -5.546810 | -0.511653 | -1.809681 |
| 77 | 1 | 0 | 5.546845  | 0.506094  | -1.813003 |

## L2

Zero-point correction= 0.55010 (a.u.)

Thermal correction to Gibbs Free Energy= 0.48627 (a.u.)

Sum of electronic and zero-point Energies= -1490.26963 (a.u.)

Sum of electronic and thermal Free Energies= -1490.33346 (a.u.)

Standard orientation:

| Center<br>Number | Atomic<br>Number | Atomic<br>Type | Coordinates (Angstroms) |           |           |
|------------------|------------------|----------------|-------------------------|-----------|-----------|
|                  |                  |                | X                       | Y         | Z         |
| 1                | 8                | 0              | -4.168441               | 2.018457  | 1.835284  |
| 2                | 8                | 0              | -2.733311               | 0.619179  | -1.858920 |
| 3                | 7                | 0              | -4.292259               | 0.319596  | 0.278453  |
| 4                | 1                | 0              | -3.896304               | 0.107848  | -0.657239 |
| 5                | 7                | 0              | -2.055880               | 1.528509  | -1.105486 |
| 6                | 6                | 0              | -5.143550               | -0.616647 | 0.887417  |
| 7                | 6                | 0              | -5.715271               | -0.440170 | 2.151966  |
| 8                | 6                | 0              | -3.870571               | 1.510471  | 0.761782  |
| 9                | 6                | 0              | -2.983322               | 2.315240  | -0.182900 |
| 10               | 1                | 0              | -2.334062               | 2.923483  | 0.461351  |
| 11               | 6                | 0              | -0.958137               | 0.867154  | -0.320830 |
| 12               | 1                | 0              | -1.468966               | 0.181408  | 0.367259  |
| 13               | 1                | 0              | -0.447406               | 1.639875  | 0.271009  |
| 14               | 1                | 0              | -0.603478               | -0.498187 | -1.901627 |
| 15               | 8                | 0              | 4.114149                | -2.158280 | 1.647042  |
| 16               | 8                | 0              | 2.716314                | -0.423017 | -1.920388 |
| 17               | 7                | 0              | 4.299129                | -0.347198 | 0.226424  |
| 18               | 1                | 0              | 3.903102                | -0.045407 | -0.684132 |
| 19               | 7                | 0              | 2.007229                | -1.359434 | -1.232220 |
| 20               | 6                | 0              | 3.830642                | -1.554013 | 0.620491  |
| 21               | 6                | 0              | 0.939886                | -0.716955 | -0.391967 |
| 22               | 1                | 0              | 1.479542                | -0.101788 | 0.339512  |
| 23               | 1                | 0              | 0.406864                | -1.512783 | 0.147747  |
| 24               | 1                | 0              | 0.601523                | 0.809618  | -1.831012 |
| 25               | 6                | 0              | -0.001812               | 0.122163  | -1.225391 |
| 26               | 6                | 0              | 5.453616                | 1.743242  | 0.306914  |
| 27               | 6                | 0              | 6.340594                | 2.631518  | 0.899583  |
| 28               | 1                | 0              | 6.527791                | 3.594253  | 0.429307  |

|    |   |   |           |           |           |
|----|---|---|-----------|-----------|-----------|
| 29 | 6 | 0 | 6.985855  | 2.292516  | 2.087199  |
| 30 | 1 | 0 | 7.681310  | 2.986883  | 2.551914  |
| 31 | 6 | 0 | 6.731343  | 1.054341  | 2.668864  |
| 32 | 1 | 0 | 7.230888  | 0.777226  | 3.594560  |
| 33 | 6 | 0 | 5.844923  | 0.152035  | 2.087325  |
| 34 | 6 | 0 | 5.199987  | 0.497813  | 0.895208  |
| 35 | 6 | 0 | -6.546717 | -1.431548 | 2.666544  |
| 36 | 1 | 0 | -6.988152 | -1.287770 | 3.650347  |
| 37 | 6 | 0 | -6.819292 | -2.591125 | 1.947087  |
| 38 | 1 | 0 | -7.472278 | -3.355093 | 2.361468  |
| 39 | 6 | 0 | -6.248011 | -2.759977 | 0.687378  |
| 40 | 1 | 0 | -6.452711 | -3.657922 | 0.108811  |
| 41 | 6 | 0 | -5.415885 | -1.782438 | 0.160245  |
| 42 | 6 | 0 | -1.544181 | 2.626639  | -2.002002 |
| 43 | 1 | 0 | -1.072734 | 2.145648  | -2.861024 |
| 44 | 1 | 0 | -0.797811 | 3.205258  | -1.440417 |
| 45 | 6 | 0 | -2.788050 | 3.440153  | -2.331628 |
| 46 | 1 | 0 | -3.230654 | 3.087007  | -3.266390 |
| 47 | 1 | 0 | -2.534391 | 4.497249  | -2.457156 |
| 48 | 6 | 0 | -3.756006 | 3.201764  | -1.155215 |
| 49 | 1 | 0 | -4.066216 | 4.121426  | -0.651075 |
| 50 | 1 | 0 | -4.659521 | 2.684834  | -1.493700 |
| 51 | 6 | 0 | 2.651086  | -3.219407 | -2.588569 |
| 52 | 1 | 0 | 3.100272  | -2.843027 | -3.511138 |
| 53 | 1 | 0 | 2.347119  | -4.256299 | -2.762406 |
| 54 | 6 | 0 | 3.640650  | -3.086285 | -1.413886 |
| 55 | 1 | 0 | 3.933415  | -4.045096 | -0.976808 |
| 56 | 1 | 0 | 4.552290  | -2.569921 | -1.730828 |
| 57 | 6 | 0 | 1.448341  | -2.368554 | -2.202988 |
| 58 | 1 | 0 | 1.006354  | -1.807069 | -3.027712 |
| 59 | 1 | 0 | 0.671345  | -2.946596 | -1.684100 |
| 60 | 6 | 0 | 2.905294  | -2.245845 | -0.374900 |
| 61 | 1 | 0 | 2.235479  | -2.874922 | 0.226665  |
| 62 | 1 | 0 | -5.505961 | 0.463971  | 2.713080  |
| 63 | 1 | 0 | -4.971054 | -1.910104 | -0.825770 |
| 64 | 1 | 0 | 5.648649  | -0.811921 | 2.541763  |
| 65 | 1 | 0 | 4.950053  | 2.004375  | -0.622966 |

---

### L3

Zero-point correction= 0.88605 (a.u.)

Thermal correction to Gibbs Free Energy= 0.80756 (a.u.)

Sum of electronic and zero-point Energies= -1961.35781 (a.u.)

Sum of electronic and thermal Free Energies= -1961.43629 (a.u.)

## Standard orientation:

| Center<br>Number | Atomic<br>Number | Atomic<br>Type | Coordinates (Angstroms) |           |           |
|------------------|------------------|----------------|-------------------------|-----------|-----------|
|                  |                  |                | X                       | Y         | Z         |
| 1                | 8                | 0              | -4.156545               | 1.393235  | 1.862673  |
| 2                | 8                | 0              | -2.529371               | 0.925161  | -1.921671 |
| 3                | 7                | 0              | -4.500565               | 0.404575  | -0.182422 |
| 4                | 1                | 0              | -4.031851               | 0.377415  | -1.101977 |
| 5                | 7                | 0              | -1.953040               | 1.661257  | -0.936079 |
| 6                | 6                | 0              | -5.362733               | -0.652893 | 0.227018  |
| 7                | 6                | 0              | -6.660426               | -0.366403 | 0.678874  |
| 8                | 6                | 0              | -7.208179               | 1.042634  | 0.756341  |
| 9                | 1                | 0              | -6.465157               | 1.721143  | 0.316327  |
| 10               | 6                | 0              | -7.426889               | 1.470846  | 2.207424  |
| 11               | 1                | 0              | -8.185892               | 0.841485  | 2.691686  |
| 12               | 1                | 0              | -7.780827               | 2.508708  | 2.251218  |
| 13               | 1                | 0              | -6.495456               | 1.397035  | 2.779150  |
| 14               | 6                | 0              | -8.492808               | 1.192652  | -0.058317 |
| 15               | 1                | 0              | -8.352122               | 0.873147  | -1.097705 |
| 16               | 1                | 0              | -9.312100               | 0.598014  | 0.365931  |
| 17               | 6                | 0              | -3.462511               | -2.267387 | -0.291148 |
| 18               | 1                | 0              | -3.102544               | -1.438158 | -0.917111 |
| 19               | 6                | 0              | -2.576971               | -2.332582 | 0.955415  |
| 20               | 1                | 0              | -2.873757               | -3.176681 | 1.592659  |
| 21               | 1                | 0              | -2.663915               | -1.422072 | 1.563351  |
| 22               | 1                | 0              | -1.520748               | -2.479309 | 0.680024  |
| 23               | 6                | 0              | -3.310814               | -3.540598 | -1.117236 |
| 24               | 1                | 0              | -2.284108               | -3.619336 | -1.498918 |
| 25               | 1                | 0              | -3.989835               | -3.549389 | -1.977283 |
| 26               | 1                | 0              | -3.502625               | -4.444485 | -0.524328 |
| 27               | 6                | 0              | -3.936988               | 1.298250  | 0.661863  |
| 28               | 6                | 0              | -2.989188               | 2.292089  | -0.004951 |
| 29               | 1                | 0              | -2.423977               | 2.758930  | 0.812705  |
| 30               | 6                | 0              | -0.977261               | 0.843864  | -0.139785 |
| 31               | 1                | 0              | -1.583111               | 0.145619  | 0.451619  |
| 32               | 1                | 0              | -0.460553               | 1.519006  | 0.558323  |
| 33               | 1                | 0              | -0.591003               | -0.563553 | -1.687492 |
| 34               | 8                | 0              | 4.110162                | -1.421081 | 1.827545  |
| 35               | 8                | 0              | 2.492178                | -0.801426 | -1.944906 |
| 36               | 7                | 0              | 4.489125                | -0.400529 | -0.195560 |
| 37               | 1                | 0              | 4.021122                | -0.332310 | -1.112979 |
| 38               | 7                | 0              | 1.887031                | -1.530078 | -0.971131 |
| 39               | 6                | 0              | 7.164925                | -1.192766 | 0.715688  |

|    |   |   |           |           |           |
|----|---|---|-----------|-----------|-----------|
| 40 | 1 | 0 | 6.382985  | -1.824393 | 0.273307  |
| 41 | 6 | 0 | 7.380833  | -1.662808 | 2.153800  |
| 42 | 1 | 0 | 8.177229  | -1.084047 | 2.641107  |
| 43 | 1 | 0 | 7.681066  | -2.718224 | 2.171034  |
| 44 | 1 | 0 | 6.461644  | -1.553311 | 2.739144  |
| 45 | 6 | 0 | 8.429510  | -1.386827 | -0.120625 |
| 46 | 1 | 0 | 8.290707  | -1.037261 | -1.150556 |
| 47 | 1 | 0 | 8.705439  | -2.448236 | -0.152225 |
| 48 | 1 | 0 | 9.282266  | -0.842123 | 0.304808  |
| 49 | 6 | 0 | 3.584209  | 2.317314  | -0.242358 |
| 50 | 1 | 0 | 3.192895  | 1.526970  | -0.898858 |
| 51 | 6 | 0 | 2.698550  | 2.372571  | 1.005143  |
| 52 | 1 | 0 | 3.013390  | 3.195641  | 1.661031  |
| 53 | 1 | 0 | 2.765400  | 1.448004  | 1.593623  |
| 54 | 1 | 0 | 1.645670  | 2.546786  | 0.733251  |
| 55 | 6 | 0 | 3.485696  | 3.625223  | -1.020408 |
| 56 | 1 | 0 | 2.463910  | 3.760401  | -1.398317 |
| 57 | 1 | 0 | 4.165508  | 3.638354  | -1.879850 |
| 58 | 1 | 0 | 3.713275  | 4.497416  | -0.393740 |
| 59 | 6 | 0 | 3.888990  | -1.287222 | 0.630646  |
| 60 | 6 | 0 | 0.950285  | -0.685769 | -0.158850 |
| 61 | 1 | 0 | 1.585421  | -0.008489 | 0.425591  |
| 62 | 1 | 0 | 0.424839  | -1.347938 | 0.544703  |
| 63 | 1 | 0 | 0.566412  | 0.768759  | -1.670604 |
| 64 | 6 | 0 | -0.011109 | 0.093207  | -1.027013 |
| 65 | 1 | 0 | -8.819995 | 2.239848  | -0.062379 |
| 66 | 6 | 0 | 4.996760  | 1.950121  | 0.166098  |
| 67 | 6 | 0 | 5.899519  | 2.934816  | 0.563946  |
| 68 | 1 | 0 | 5.607220  | 3.982291  | 0.524025  |
| 69 | 6 | 0 | 7.166163  | 2.596867  | 1.025982  |
| 70 | 1 | 0 | 7.856596  | 3.375938  | 1.341466  |
| 71 | 6 | 0 | 7.549384  | 1.264918  | 1.079573  |
| 72 | 1 | 0 | 8.546952  | 1.009531  | 1.433994  |
| 73 | 6 | 0 | 6.686533  | 0.242731  | 0.675395  |
| 74 | 6 | 0 | 5.404522  | 0.603572  | 0.233367  |
| 75 | 6 | 0 | -7.471091 | -1.439077 | 1.059437  |
| 76 | 1 | 0 | -8.479240 | -1.242104 | 1.420880  |
| 77 | 6 | 0 | -7.022759 | -2.749023 | 0.975739  |
| 78 | 1 | 0 | -7.672909 | -3.568668 | 1.273319  |
| 79 | 6 | 0 | -5.741364 | -3.012358 | 0.505956  |
| 80 | 1 | 0 | -5.394826 | -4.042075 | 0.442328  |
| 81 | 6 | 0 | -4.889822 | -1.975343 | 0.128475  |
| 82 | 6 | 0 | -1.329329 | 2.891067  | -1.544330 |
| 83 | 1 | 0 | -0.749771 | 2.562773  | -2.409597 |

|     |   |   |           |           |           |
|-----|---|---|-----------|-----------|-----------|
| 84  | 1 | 0 | -0.664570 | 3.345041  | -0.795914 |
| 85  | 6 | 0 | -2.523199 | 3.777481  | -1.874641 |
| 86  | 1 | 0 | -2.840704 | 3.612996  | -2.907417 |
| 87  | 1 | 0 | -2.259005 | 4.834019  | -1.767416 |
| 88  | 6 | 0 | -3.635956 | 3.346551  | -0.894667 |
| 89  | 1 | 0 | -4.015906 | 4.171110  | -0.284089 |
| 90  | 1 | 0 | -4.482010 | 2.911863  | -1.436039 |
| 91  | 6 | 0 | 2.358048  | -3.659780 | -1.938688 |
| 92  | 1 | 0 | 2.679656  | -3.501791 | -2.971250 |
| 93  | 1 | 0 | 2.044866  | -4.703673 | -1.839704 |
| 94  | 6 | 0 | 3.493202  | -3.290208 | -0.959810 |
| 95  | 1 | 0 | 3.841062  | -4.138305 | -0.362406 |
| 96  | 1 | 0 | 4.354307  | -2.884264 | -1.499935 |
| 97  | 6 | 0 | 1.207631  | -2.721153 | -1.597504 |
| 98  | 1 | 0 | 0.649265  | -2.355231 | -2.461232 |
| 99  | 1 | 0 | 0.516318  | -3.151198 | -0.858046 |
| 100 | 6 | 0 | 2.895215  | -2.222486 | -0.052475 |
| 101 | 1 | 0 | 2.310380  | -2.677856 | 0.757714  |

### OTf

Zero-point correction= 0.02781 (a.u.)

Thermal correction to Gibbs Free Energy= -0.00436 (a.u.)

Sum of electronic and zero-point Energies= -961.30640 (a.u.)

Sum of electronic and thermal Free Energies= -961.33857 (a.u.)

Standard orientation:

| Center<br>Number | Atomic<br>Number | Atomic<br>Type | Coordinates (Angstroms) |           |           |
|------------------|------------------|----------------|-------------------------|-----------|-----------|
|                  |                  |                | X                       | Y         | Z         |
| 1                | 6                | 0              | -0.938457               | -0.000454 | -0.000344 |
| 2                | 9                | 0              | -1.436816               | 0.436816  | 1.165526  |
| 3                | 9                | 0              | -1.432104               | -1.230320 | -0.204111 |
| 4                | 9                | 0              | -1.435341               | 0.789970  | -0.963240 |
| 5                | 16               | 0              | 0.923616                | 0.000787  | 0.000320  |
| 6                | 8                | 0              | 1.233503                | -0.913143 | 1.109238  |
| 7                | 8                | 0              | 1.235261                | -0.502962 | -1.345157 |
| 8                | 8                | 0              | 1.230141                | 1.418845  | 0.237590  |

### L1-Sc(III)-OTf

Zero-point correction= 0.72500 (a.u.)

Thermal correction to Gibbs Free Energy= 0.65399 (a.u.)

Sum of electronic and zero-point Energies= -3219.03680 (a.u.)

Sum of electronic and thermal Free Energies= -3219.10781 (a.u.)

Standard orientation:

| Center<br>Number | Atomic<br>Number | Atomic<br>Type | Coordinates (Angstroms) |           |           |
|------------------|------------------|----------------|-------------------------|-----------|-----------|
|                  |                  |                | X                       | Y         | Z         |
| 1                | 6                | 0              | 4.596543                | -0.489973 | -0.462600 |
| 2                | 6                | 0              | 5.352660                | -1.583016 | 0.280897  |
| 3                | 6                | 0              | 5.462323                | 0.185582  | -1.519486 |
| 4                | 6                | 0              | 5.895292                | -2.611612 | -0.708144 |
| 5                | 6                | 0              | 6.003121                | -0.851558 | -2.499915 |
| 6                | 6                | 0              | 6.766072                | -1.951402 | -1.771443 |
| 7                | 1                | 0              | 7.126429                | -2.700204 | -2.485313 |
| 8                | 1                | 0              | 7.661655                | -1.521662 | -1.295728 |
| 9                | 1                | 0              | 5.049364                | -3.127041 | -1.190486 |
| 10               | 1                | 0              | 6.456036                | -3.380770 | -0.165798 |
| 11               | 1                | 0              | 4.694806                | -2.055283 | 1.022818  |
| 12               | 1                | 0              | 6.192986                | -1.125715 | 0.831446  |
| 13               | 1                | 0              | 4.880846                | 0.958701  | -2.040287 |
| 14               | 1                | 0              | 6.305121                | 0.693562  | -1.020200 |
| 15               | 1                | 0              | 5.163441                | -1.294421 | -3.058317 |
| 16               | 1                | 0              | 6.641616                | -0.358118 | -3.241022 |
| 17               | 6                | 0              | -4.815235               | -0.532666 | 0.243519  |
| 18               | 6                | 0              | -4.582366               | -1.780823 | -0.601677 |
| 19               | 6                | 0              | -6.280919               | -0.355555 | 0.606435  |
| 20               | 6                | 0              | -5.094851               | -3.014536 | 0.133638  |
| 21               | 6                | 0              | -6.798859               | -1.599258 | 1.325664  |
| 22               | 6                | 0              | -6.566873               | -2.859298 | 0.498679  |
| 23               | 1                | 0              | -6.915977               | -3.739831 | 1.049413  |
| 24               | 1                | 0              | -7.170578               | -2.810646 | -0.421354 |
| 25               | 1                | 0              | -4.498107               | -3.162990 | 1.046789  |
| 26               | 1                | 0              | -4.933194               | -3.903966 | -0.485487 |
| 27               | 1                | 0              | -3.513196               | -1.878587 | -0.839341 |
| 28               | 1                | 0              | -5.123681               | -1.663804 | -1.556095 |
| 29               | 1                | 0              | -6.415268               | 0.541735  | 1.224841  |
| 30               | 1                | 0              | -6.862724               | -0.205377 | -0.320260 |
| 31               | 1                | 0              | -6.284575               | -1.695302 | 2.294624  |
| 32               | 1                | 0              | -7.862798               | -1.471577 | 1.553641  |
| 33               | 1                | 0              | -4.202224               | -0.581600 | 1.154690  |
| 34               | 8                | 0              | 1.933449                | 0.450928  | -0.075333 |
| 35               | 8                | 0              | 0.213102                | 1.771549  | 1.566766  |
| 36               | 8                | 0              | -0.391876               | 1.797605  | -1.326166 |
| 37               | 8                | 0              | -2.230658               | 0.600319  | 0.262568  |
| 38               | 7                | 0              | 1.264981                | 2.656096  | 1.590569  |

|    |    |   |           |           |           |
|----|----|---|-----------|-----------|-----------|
| 39 | 7  | 0 | -1.377528 | 2.758296  | -1.357005 |
| 40 | 7  | 0 | -4.343892 | 0.658579  | -0.506520 |
| 41 | 1  | 0 | -5.003139 | 1.070215  | -1.162380 |
| 42 | 7  | 0 | 4.110480  | 0.522893  | 0.503160  |
| 43 | 1  | 0 | 4.817044  | 0.944582  | 1.101248  |
| 44 | 6  | 0 | 2.857788  | 0.906929  | 0.642007  |
| 45 | 6  | 0 | 2.589424  | 1.918508  | 1.742281  |
| 46 | 1  | 0 | 3.357268  | 2.705056  | 1.700963  |
| 47 | 6  | 0 | 2.492704  | 1.332252  | 3.150616  |
| 48 | 1  | 0 | 3.491210  | 1.187323  | 3.573204  |
| 49 | 1  | 0 | 2.001751  | 0.353410  | 3.115232  |
| 50 | 6  | 0 | 1.645999  | 2.352793  | 3.938594  |
| 51 | 1  | 0 | 0.788176  | 1.858824  | 4.399874  |
| 52 | 1  | 0 | 2.215950  | 2.836955  | 4.735598  |
| 53 | 6  | 0 | 1.187636  | 3.386725  | 2.915553  |
| 54 | 1  | 0 | 0.156557  | 3.723839  | 3.038785  |
| 55 | 1  | 0 | 1.858012  | 4.252159  | 2.848736  |
| 56 | 6  | 0 | 1.261242  | 3.564924  | 0.383456  |
| 57 | 1  | 0 | 1.501887  | 2.937608  | -0.478284 |
| 58 | 1  | 0 | 2.083364  | 4.273123  | 0.542343  |
| 59 | 6  | 0 | -0.021175 | 4.352191  | 0.144184  |
| 60 | 1  | 0 | 0.210531  | 5.040503  | -0.679958 |
| 61 | 1  | 0 | -0.221260 | 5.010995  | 1.000145  |
| 62 | 6  | 0 | -1.340624 | 3.640832  | -0.130975 |
| 63 | 1  | 0 | -1.633365 | 3.011860  | 0.712524  |
| 64 | 1  | 0 | -2.118893 | 4.397514  | -0.287794 |
| 65 | 6  | 0 | -1.211878 | 3.509000  | -2.661685 |
| 66 | 1  | 0 | -0.158567 | 3.783432  | -2.746585 |
| 67 | 6  | 0 | -1.701282 | 2.527541  | -3.719494 |
| 68 | 1  | 0 | -0.863559 | 1.971908  | -4.146218 |
| 69 | 6  | 0 | -2.661867 | 1.571272  | -2.984480 |
| 70 | 1  | 0 | -3.657175 | 1.536582  | -3.436907 |
| 71 | 1  | 0 | -2.273191 | 0.545913  | -2.967499 |
| 72 | 6  | 0 | -2.744896 | 2.120075  | -1.557776 |
| 73 | 1  | 0 | -3.463293 | 2.950836  | -1.497759 |
| 74 | 6  | 0 | -3.094329 | 1.072658  | -0.517228 |
| 75 | 1  | 0 | -2.192803 | 3.063233  | -4.535456 |
| 76 | 1  | 0 | -1.829022 | 4.413360  | -2.596172 |
| 77 | 21 | 0 | -0.149599 | 0.377889  | 0.121636  |
| 78 | 16 | 0 | -0.514614 | -2.348179 | 0.281819  |
| 79 | 8  | 0 | -0.205693 | -1.380408 | 1.401090  |
| 80 | 8  | 0 | -1.673246 | -3.187712 | 0.419710  |
| 81 | 8  | 0 | -0.422919 | -1.487647 | -0.960744 |
| 82 | 6  | 0 | 0.977675  | -3.449138 | 0.207808  |



|    |   |   |          |           |           |
|----|---|---|----------|-----------|-----------|
| 83 | 9 | 0 | 1.042974 | -4.142895 | 1.322401  |
| 84 | 9 | 0 | 2.065575 | -2.691961 | 0.087924  |
| 85 | 9 | 0 | 0.871749 | -4.243160 | -0.833297 |
| 86 | 1 | 0 | 3.699746 | -0.911776 | -0.934027 |

**L2-Sc(III)-OTf**

Zero-point correction= 0.58538 (a.u.)

Thermal correction to Gibbs Free Energy= 0.51644 (a.u.)

Sum of electronic and zero-point Energies= -3211.90199 (a.u.)

Sum of electronic and thermal Free Energies= -3211.97093 (a.u.)

Standard orientation:

| Center<br>Number | Atomic<br>Number | Atomic<br>Type | Coordinates (Angstroms) |           |           |
|------------------|------------------|----------------|-------------------------|-----------|-----------|
|                  |                  |                | X                       | Y         | Z         |
| 1                | 8                | 0              | -2.118645               | -0.942951 | -0.488710 |
| 2                | 8                | 0              | -0.373586               | -1.639059 | 1.492644  |
| 3                | 8                | 0              | 0.381234                | -2.016860 | -1.357166 |
| 4                | 8                | 0              | 1.993778                | -0.343484 | 0.049164  |
| 5                | 7                | 0              | -1.355453               | -2.598900 | 1.601970  |
| 6                | 7                | 0              | 1.441683                | -2.874318 | -1.184837 |
| 7                | 7                | 0              | 4.191162                | -0.470721 | -0.475803 |
| 8                | 1                | 0              | 4.910318                | -1.026800 | -0.930707 |
| 9                | 7                | 0              | -4.084401               | -0.325532 | 0.447971  |
| 10               | 1                | 0              | -4.696725               | -0.429654 | 1.252078  |
| 11               | 6                | 0              | -2.961286               | -1.021777 | 0.439672  |
| 12               | 6                | 0              | -2.729929               | -1.937829 | 1.631556  |
| 13               | 1                | 0              | -3.453495               | -2.766551 | 1.593616  |
| 14               | 6                | 0              | -2.757903               | -1.241920 | 2.997306  |
| 15               | 1                | 0              | -3.779570               | -1.213151 | 3.388557  |
| 16               | 1                | 0              | -2.404916               | -0.210042 | 2.894247  |
| 17               | 6                | 0              | -1.812562               | -2.064129 | 3.893883  |
| 18               | 1                | 0              | -1.002157               | -1.434158 | 4.266811  |
| 19               | 1                | 0              | -2.323458               | -2.493312 | 4.759269  |
| 20               | 6                | 0              | -1.265268               | -3.167732 | 3.002633  |
| 21               | 1                | 0              | -0.219491               | -3.425574 | 3.183181  |
| 22               | 1                | 0              | -1.881368               | -4.075199 | 3.018954  |
| 23               | 6                | 0              | -1.232171               | -3.656100 | 0.525902  |
| 24               | 1                | 0              | -1.483775               | -3.170833 | -0.417979 |
| 25               | 1                | 0              | -2.002441               | -4.402950 | 0.752152  |
| 26               | 6                | 0              | 0.119595                | -4.355953 | 0.450972  |
| 27               | 1                | 0              | -0.006105               | -5.154689 | -0.292657 |
| 28               | 1                | 0              | 0.318589                | -4.887706 | 1.391208  |

|    |    |   |           |           |           |
|----|----|---|-----------|-----------|-----------|
| 29 | 6  | 0 | 1.393520  | -3.572968 | 0.155332  |
| 30 | 1  | 0 | 1.569787  | -2.807162 | 0.914265  |
| 31 | 1  | 0 | 2.241501  | -4.268282 | 0.155848  |
| 32 | 6  | 0 | 1.433371  | -3.825932 | -2.363881 |
| 33 | 1  | 0 | 0.415848  | -4.209391 | -2.463038 |
| 34 | 6  | 0 | 1.912466  | -2.974918 | -3.532213 |
| 35 | 1  | 0 | 1.063307  | -2.566562 | -4.084350 |
| 36 | 6  | 0 | 2.741426  | -1.837332 | -2.902897 |
| 37 | 1  | 0 | 3.763842  | -1.788907 | -3.288714 |
| 38 | 1  | 0 | 2.277013  | -0.860904 | -3.081890 |
| 39 | 6  | 0 | 2.755301  | -2.145543 | -1.402093 |
| 40 | 1  | 0 | 3.536910  | -2.882469 | -1.165369 |
| 41 | 6  | 0 | 2.944070  | -0.916893 | -0.528221 |
| 42 | 1  | 0 | 2.499226  | -3.580194 | -4.227529 |
| 43 | 1  | 0 | 2.119340  | -4.646616 | -2.120659 |
| 44 | 21 | 0 | -0.105458 | -0.444656 | -0.143035 |
| 45 | 6  | 0 | 4.620111  | 0.781309  | 0.099161  |
| 46 | 6  | 0 | 4.129448  | 1.977761  | -0.413707 |
| 47 | 6  | 0 | 4.620665  | 3.173635  | 0.097720  |
| 48 | 6  | 0 | 5.588957  | 0.752718  | 1.097168  |
| 49 | 6  | 0 | 6.071635  | 1.956413  | 1.599289  |
| 50 | 1  | 0 | 5.961589  | -0.197410 | 1.474339  |
| 51 | 1  | 0 | 6.829107  | 1.950366  | 2.377661  |
| 52 | 1  | 0 | 4.254629  | 4.117299  | -0.297637 |
| 53 | 1  | 0 | 3.378589  | 1.975830  | -1.203202 |
| 54 | 6  | 0 | -4.481726 | 0.681919  | -0.499188 |
| 55 | 6  | 0 | -4.276956 | 0.519917  | -1.866568 |
| 56 | 6  | 0 | -4.699599 | 1.528620  | -2.725287 |
| 57 | 6  | 0 | -5.110812 | 1.813116  | 0.015193  |
| 58 | 6  | 0 | -5.533547 | 2.808368  | -0.856231 |
| 59 | 1  | 0 | -5.257500 | 1.921672  | 1.088615  |
| 60 | 1  | 0 | -6.021693 | 3.695423  | -0.463438 |
| 61 | 1  | 0 | -4.550595 | 1.415224  | -3.795398 |
| 62 | 1  | 0 | -3.807912 | -0.377405 | -2.256769 |
| 63 | 16 | 0 | -0.812413 | 2.235062  | -0.091529 |
| 64 | 8  | 0 | -0.976926 | 1.227191  | 1.022293  |
| 65 | 8  | 0 | -0.143235 | 1.424342  | -1.187194 |
| 66 | 8  | 0 | -1.942788 | 3.044108  | -0.450099 |
| 67 | 6  | 0 | 0.539488  | 3.346788  | 0.529462  |
| 68 | 9  | 0 | 1.498515  | 2.585039  | 1.036571  |
| 69 | 9  | 0 | 0.049904  | 4.134771  | 1.459421  |
| 70 | 9  | 0 | 1.017498  | 4.053916  | -0.476020 |
| 71 | 6  | 0 | -5.323240 | 2.668937  | -2.225562 |
| 72 | 1  | 0 | -5.653766 | 3.448070  | -2.906494 |

|    |   |   |          |          |          |
|----|---|---|----------|----------|----------|
| 73 | 6 | 0 | 5.588550 | 3.163393 | 1.099474 |
| 74 | 1 | 0 | 5.974120 | 4.102061 | 1.487693 |

-----

### L3-Sc(III)-OTf

Zero-point correction= 0.92403 (a.u.)

Thermal correction to Gibbs Free Energy= 0.84173 (a.u.)

Sum of electronic and zero-point Energies= -3683.00884 (a.u.)

Sum of electronic and thermal Free Energies= -3683.09114 (a.u.)

Standard orientation:

-----

| Center<br>Number | Atomic<br>Number | Atomic<br>Type | Coordinates (Angstroms) |           |           |
|------------------|------------------|----------------|-------------------------|-----------|-----------|
|                  |                  |                | X                       | Y         | Z         |
| 1                | 8                | 0              | -2.171809               | -0.358784 | 0.014633  |
| 2                | 8                | 0              | -0.254650               | -1.373307 | 1.667455  |
| 3                | 8                | 0              | -0.056802               | -2.007648 | -1.180115 |
| 4                | 8                | 0              | 1.978212                | -0.544589 | -0.166800 |
| 5                | 7                | 0              | -1.320316               | -2.161007 | 2.028916  |
| 6                | 7                | 0              | 0.885009                | -3.007012 | -1.125152 |
| 7                | 7                | 0              | 4.071083                | -1.201347 | -0.654395 |
| 8                | 1                | 0              | 4.655172                | -1.872422 | -1.146203 |
| 9                | 7                | 0              | -4.243659               | -0.198872 | 0.872327  |
| 10               | 1                | 0              | -4.853582               | -0.406466 | 1.659268  |
| 11               | 6                | 0              | -2.985041               | -0.586880 | 0.938590  |
| 12               | 6                | 0              | -2.581166               | -1.324305 | 2.198332  |
| 13               | 1                | 0              | -3.368615               | -2.049172 | 2.453991  |
| 14               | 6                | 0              | -2.249234               | -0.442835 | 3.399799  |
| 15               | 1                | 0              | -3.167518               | -0.139017 | 3.912368  |
| 16               | 1                | 0              | -1.735211               | 0.466584  | 3.068562  |
| 17               | 6                | 0              | -1.326930               | -1.321914 | 4.272284  |
| 18               | 1                | 0              | -0.389799               | -0.798370 | 4.476065  |
| 19               | 1                | 0              | -1.781844               | -1.575515 | 5.233132  |
| 20               | 6                | 0              | -1.067795               | -2.588178 | 3.459662  |
| 21               | 1                | 0              | -0.040715               | -2.958143 | 3.509217  |
| 22               | 1                | 0              | -1.769869               | -3.399601 | 3.686974  |
| 23               | 6                | 0              | -1.538614               | -3.296566 | 1.056241  |
| 24               | 1                | 0              | -1.888106               | -2.842197 | 0.124943  |
| 25               | 1                | 0              | -2.352955               | -3.898461 | 1.477745  |
| 26               | 6                | 0              | -0.340406               | -4.202842 | 0.803493  |
| 27               | 1                | 0              | -0.713272               | -5.003331 | 0.149814  |
| 28               | 1                | 0              | -0.057740               | -4.718063 | 1.731869  |
| 29               | 6                | 0              | 0.960399                | -3.641742 | 0.245004  |
| 30               | 1                | 0              | 1.377285                | -2.884278 | 0.914693  |

|    |    |   |           |           |           |
|----|----|---|-----------|-----------|-----------|
| 31 | 1  | 0 | 1.684842  | -4.459706 | 0.150196  |
| 32 | 6  | 0 | 0.557813  | -3.971078 | -2.246080 |
| 33 | 1  | 0 | -0.515122 | -4.169433 | -2.193337 |
| 34 | 6  | 0 | 1.009988  | -3.243241 | -3.510477 |
| 35 | 1  | 0 | 0.162781  | -2.763896 | -4.006191 |
| 36 | 6  | 0 | 2.030693  | -2.182712 | -3.045585 |
| 37 | 1  | 0 | 2.978888  | -2.225223 | -3.590583 |
| 38 | 1  | 0 | 1.629199  | -1.169428 | -3.159369 |
| 39 | 6  | 0 | 2.250425  | -2.496771 | -1.568255 |
| 40 | 1  | 0 | 2.925320  | -3.357357 | -1.453511 |
| 41 | 6  | 0 | 2.759012  | -1.341056 | -0.731906 |
| 42 | 1  | 0 | 1.446160  | -3.953049 | -4.218024 |
| 43 | 1  | 0 | 1.118725  | -4.894252 | -2.056135 |
| 44 | 21 | 0 | -0.088387 | -0.293868 | -0.058334 |
| 45 | 6  | 0 | 4.719347  | -0.080585 | -0.003878 |
| 46 | 6  | 0 | 4.733220  | -0.017072 | 1.395233  |
| 47 | 6  | 0 | 5.372027  | 1.086246  | 1.966697  |
| 48 | 6  | 0 | 5.317801  | 0.879482  | -0.836665 |
| 49 | 6  | 0 | 5.943776  | 1.955408  | -0.211042 |
| 50 | 6  | 0 | 5.232648  | 0.770584  | -2.345997 |
| 51 | 1  | 0 | 6.425169  | 2.722800  | -0.811193 |
| 52 | 1  | 0 | 5.412309  | 1.181330  | 3.049928  |
| 53 | 6  | 0 | -4.790317 | 0.542168  | -0.246602 |
| 54 | 6  | 0 | -5.209225 | -0.177807 | -1.372214 |
| 55 | 6  | 0 | -5.739513 | 0.563382  | -2.430184 |
| 56 | 6  | 0 | -4.864595 | 1.940525  | -0.132885 |
| 57 | 6  | 0 | -5.407327 | 2.625470  | -1.218592 |
| 58 | 6  | 0 | -4.401728 | 2.655044  | 1.122300  |
| 59 | 1  | 0 | -5.487284 | 3.707947  | -1.184990 |
| 60 | 1  | 0 | -6.081212 | 0.049542  | -3.326070 |
| 61 | 6  | 0 | -5.079031 | -1.683304 | -1.486931 |
| 62 | 16 | 0 | -0.176348 | 2.456183  | -0.172419 |
| 63 | 8  | 0 | -1.232523 | 3.428304  | -0.242109 |
| 64 | 8  | 0 | -0.107111 | 1.585925  | 1.062596  |
| 65 | 8  | 0 | -0.060067 | 1.460329  | -1.308070 |
| 66 | 6  | 0 | 1.440095  | 3.372143  | -0.179809 |
| 67 | 9  | 0 | 1.464116  | 4.173550  | 0.863681  |
| 68 | 9  | 0 | 1.528347  | 4.061573  | -1.298011 |
| 69 | 9  | 0 | 2.435319  | 2.501945  | -0.105401 |
| 70 | 6  | 0 | -5.839849 | 1.944955  | -2.352503 |
| 71 | 1  | 0 | -6.260070 | 2.502510  | -3.185449 |
| 72 | 6  | 0 | 5.966472  | 2.059387  | 1.176080  |
| 73 | 1  | 0 | 6.461617  | 2.906055  | 1.644422  |
| 74 | 6  | 0 | -5.397083 | 2.446243  | 2.268696  |

|     |   |   |           |           |           |
|-----|---|---|-----------|-----------|-----------|
| 75  | 6 | 0 | -4.177245 | 4.149395  | 0.926065  |
| 76  | 1 | 0 | -6.370398 | 2.878172  | 2.004661  |
| 77  | 1 | 0 | -5.047487 | 2.945618  | 3.179703  |
| 78  | 1 | 0 | -5.574398 | 1.391211  | 2.518432  |
| 79  | 1 | 0 | -3.718934 | 4.575105  | 1.825145  |
| 80  | 1 | 0 | -3.512302 | 4.358955  | 0.082907  |
| 81  | 1 | 0 | -5.125830 | 4.678068  | 0.768958  |
| 82  | 1 | 0 | -3.426825 | 2.219368  | 1.411668  |
| 83  | 6 | 0 | -6.365942 | -2.345693 | -1.974279 |
| 84  | 1 | 0 | -4.869992 | -2.090418 | -0.483684 |
| 85  | 6 | 0 | -3.904004 | -2.055386 | -2.397062 |
| 86  | 1 | 0 | -7.228432 | -2.058856 | -1.363325 |
| 87  | 1 | 0 | -6.589978 | -2.077029 | -3.013305 |
| 88  | 1 | 0 | -3.783975 | -3.146524 | -2.442336 |
| 89  | 1 | 0 | -2.962507 | -1.605749 | -2.055295 |
| 90  | 1 | 0 | -6.270071 | -3.436919 | -1.939371 |
| 91  | 1 | 0 | -4.084757 | -1.702609 | -3.420316 |
| 92  | 6 | 0 | 3.885468  | 1.307845  | -2.839896 |
| 93  | 6 | 0 | 6.374771  | 1.465444  | -3.077009 |
| 94  | 6 | 0 | 4.103117  | -1.066374 | 2.286679  |
| 95  | 6 | 0 | 2.903171  | -0.495498 | 3.046996  |
| 96  | 6 | 0 | 5.119880  | -1.673106 | 3.252818  |
| 97  | 1 | 0 | 3.739995  | -1.888774 | 1.649985  |
| 98  | 1 | 0 | 5.289028  | -0.297939 | -2.616718 |
| 99  | 1 | 0 | 6.329789  | 1.234361  | -4.146519 |
| 100 | 1 | 0 | 7.354335  | 1.148623  | -2.703365 |
| 101 | 1 | 0 | 3.781017  | 1.162917  | -3.921888 |
| 102 | 1 | 0 | 3.029257  | 0.834169  | -2.338737 |
| 103 | 1 | 0 | 3.817319  | 2.384418  | -2.638480 |
| 104 | 1 | 0 | 5.501161  | -0.923699 | 3.956043  |
| 105 | 1 | 0 | 5.980258  | -2.097396 | 2.724057  |
| 106 | 1 | 0 | 2.364179  | -1.296770 | 3.571929  |
| 107 | 1 | 0 | 3.229209  | 0.229320  | 3.802988  |
| 108 | 1 | 0 | 6.309890  | 2.556320  | -2.986431 |
| 109 | 1 | 0 | 4.656640  | -2.469415 | 3.847250  |
| 110 | 1 | 0 | 2.199612  | 0.017971  | 2.379907  |

-----

### L1-CH<sub>2</sub>O-OTf

Zero-point correction= 0.75551 (a.u.)

Thermal correction to Gibbs Free Energy= 0.68096 (a.u.)

Sum of electronic and zero-point Energies= -3333.48598 (a.u.)

Sum of electronic and thermal Free Energies= -3333.56053 (a.u.)

Standard orientation:

| Center<br>Number | Atomic<br>Number | Atomic<br>Type | Coordinates (Angstroms) |           |           |
|------------------|------------------|----------------|-------------------------|-----------|-----------|
|                  |                  |                | X                       | Y         | Z         |
| 1                | 8                | 0              | -1.820750               | -1.085870 | -0.115115 |
| 2                | 8                | 0              | 0.278081                | -1.173719 | 1.595041  |
| 3                | 8                | 0              | 0.854074                | -2.376648 | -1.017748 |
| 4                | 8                | 0              | 2.263031                | -0.125621 | -0.422771 |
| 5                | 7                | 0              | -0.520435               | -2.140234 | 2.161233  |
| 6                | 7                | 0              | 2.037351                | -2.995449 | -0.705400 |
| 7                | 7                | 0              | 4.490267                | -0.223948 | -0.702834 |
| 8                | 1                | 0              | 5.298254                | -0.793295 | -0.939799 |
| 9                | 7                | 0              | -3.818472               | -0.914316 | 0.909755  |
| 10               | 1                | 0              | -4.344906               | -1.022460 | 1.772562  |
| 11               | 6                | 0              | -2.535529               | -1.205024 | 0.914910  |
| 12               | 6                | 0              | -1.962432               | -1.656928 | 2.245365  |
| 13               | 1                | 0              | -2.536294               | -2.523053 | 2.607271  |
| 14               | 6                | 0              | -1.903733               | -0.553865 | 3.308576  |
| 15               | 1                | 0              | -2.857088               | -0.497072 | 3.842595  |
| 16               | 1                | 0              | -1.739976               | 0.417196  | 2.829162  |
| 17               | 6                | 0              | -0.729673               | -0.944193 | 4.226291  |
| 18               | 1                | 0              | 0.020617                | -0.150576 | 4.237389  |
| 19               | 1                | 0              | -1.043373               | -1.118727 | 5.258519  |
| 20               | 6                | 0              | -0.150466               | -2.216763 | 3.628059  |
| 21               | 1                | 0              | 0.936903                | -2.295206 | 3.687372  |
| 22               | 1                | 0              | -0.612211               | -3.128530 | 4.027341  |
| 23               | 6                | 0              | -0.390908               | -3.461587 | 1.442775  |
| 24               | 1                | 0              | -0.794393               | -3.309279 | 0.439557  |
| 25               | 1                | 0              | -1.042778               | -4.160830 | 1.980014  |
| 26               | 6                | 0              | 1.017293                | -4.043053 | 1.401768  |
| 27               | 1                | 0              | 0.920991                | -5.022081 | 0.913008  |
| 28               | 1                | 0              | 1.347038                | -4.279176 | 2.422624  |
| 29               | 6                | 0              | 2.163910                | -3.260022 | 0.775631  |
| 30               | 1                | 0              | 2.281031                | -2.284871 | 1.256267  |
| 31               | 1                | 0              | 3.092736                | -3.829428 | 0.900466  |
| 32               | 6                | 0              | 2.120251                | -4.244529 | -1.558601 |
| 33               | 1                | 0              | 1.163882                | -4.762352 | -1.463000 |
| 34               | 6                | 0              | 2.425169                | -3.721578 | -2.957692 |
| 35               | 1                | 0              | 1.507890                | -3.629056 | -3.543033 |
| 36               | 6                | 0              | 3.075207                | -2.337578 | -2.753105 |
| 37               | 1                | 0              | 4.051111                | -2.245581 | -3.238577 |
| 38               | 1                | 0              | 2.435914                | -1.537073 | -3.141052 |
| 39               | 6                | 0              | 3.224157                | -2.202427 | -1.238171 |
| 40               | 1                | 0              | 4.110742                | -2.751026 | -0.888582 |

|    |    |   |           |           |           |
|----|----|---|-----------|-----------|-----------|
| 41 | 6  | 0 | 3.290658  | -0.772038 | -0.736600 |
| 42 | 1  | 0 | 3.084859  | -4.414771 | -3.485604 |
| 43 | 1  | 0 | 2.924410  | -4.867529 | -1.148812 |
| 44 | 21 | 0 | 0.203304  | -0.525905 | -0.345680 |
| 45 | 6  | 0 | 4.756812  | 1.183400  | -0.322511 |
| 46 | 6  | 0 | 4.942272  | 1.295455  | 1.187466  |
| 47 | 6  | 0 | 5.262590  | 2.736757  | 1.573210  |
| 48 | 6  | 0 | 5.979285  | 1.679843  | -1.080732 |
| 49 | 6  | 0 | 6.302816  | 3.117711  | -0.683010 |
| 50 | 1  | 0 | 6.840136  | 1.033832  | -0.832933 |
| 51 | 1  | 0 | 5.812297  | 1.600487  | -2.163199 |
| 52 | 1  | 0 | 7.198625  | 3.451400  | -1.217895 |
| 53 | 1  | 0 | 5.483464  | 3.775971  | -1.011122 |
| 54 | 1  | 0 | 5.412127  | 2.803060  | 2.656802  |
| 55 | 1  | 0 | 4.395914  | 3.375014  | 1.339582  |
| 56 | 1  | 0 | 5.774561  | 0.638050  | 1.489413  |
| 57 | 1  | 0 | 4.038617  | 0.938912  | 1.700868  |
| 58 | 1  | 0 | 3.868286  | 1.755012  | -0.626035 |
| 59 | 6  | 0 | -4.516812 | -0.247935 | -0.214282 |
| 60 | 6  | 0 | -5.124771 | -1.263377 | -1.172665 |
| 61 | 6  | 0 | -5.836633 | -0.534496 | -2.310443 |
| 62 | 6  | 0 | -5.556520 | 0.708850  | 0.347789  |
| 63 | 6  | 0 | -6.260990 | 1.429767  | -0.797858 |
| 64 | 1  | 0 | -6.296923 | 0.136673  | 0.933802  |
| 65 | 1  | 0 | -5.070303 | 1.425348  | 1.022347  |
| 66 | 1  | 0 | -7.020065 | 2.109168  | -0.395259 |
| 67 | 1  | 0 | -5.526091 | 2.060557  | -1.323534 |
| 68 | 1  | 0 | -6.291188 | -1.262709 | -2.991719 |
| 69 | 1  | 0 | -5.095169 | 0.027100  | -2.904088 |
| 70 | 1  | 0 | -5.846057 | -1.889718 | -0.623579 |
| 71 | 1  | 0 | -4.341809 | -1.934426 | -1.555261 |
| 72 | 1  | 0 | -3.749989 | 0.341389  | -0.736376 |
| 73 | 16 | 0 | -1.540802 | 2.233785  | -0.031557 |
| 74 | 8  | 0 | -2.374762 | 1.970500  | 1.132857  |
| 75 | 8  | 0 | -0.236737 | 1.444229  | 0.023662  |
| 76 | 8  | 0 | -2.165467 | 2.140601  | -1.354334 |
| 77 | 6  | 0 | -0.910150 | 3.969886  | 0.128406  |
| 78 | 9  | 0 | -0.265340 | 4.089914  | 1.276224  |
| 79 | 9  | 0 | -1.936751 | 4.793480  | 0.096324  |
| 80 | 9  | 0 | -0.088056 | 4.227122  | -0.874854 |
| 81 | 6  | 0 | -6.881881 | 0.438004  | -1.774824 |
| 82 | 1  | 0 | -7.364109 | 0.969361  | -2.602957 |
| 83 | 1  | 0 | -7.677283 | -0.128363 | -1.265568 |
| 84 | 6  | 0 | 6.488968  | 3.246402  | 0.824350  |

|    |   |   |           |           |           |
|----|---|---|-----------|-----------|-----------|
| 85 | 1 | 0 | 6.692005  | 4.289017  | 1.092748  |
| 86 | 1 | 0 | 7.373735  | 2.668650  | 1.134884  |
| 87 | 6 | 0 | -1.418466 | 0.292441  | -2.909669 |
| 88 | 1 | 0 | -1.409213 | 0.947499  | -3.793291 |
| 89 | 1 | 0 | -2.391281 | -0.070281 | -2.538716 |
| 90 | 8 | 0 | -0.368019 | -0.072040 | -2.396035 |

## L2-CH<sub>2</sub>O-OTf

Zero-point correction= 0.61557 (a.u.)

Thermal correction to Gibbs Free Energy= 0.54183 (a.u.)

Sum of electronic and zero-point Energies= -3326.35846 (a.u.)

Sum of electronic and thermal Free Energies= -3326.43220 (a.u.)

Standard orientation:

| Center<br>Number | Atomic<br>Number | Atomic<br>Type | Coordinates (Angstroms) |           |           |
|------------------|------------------|----------------|-------------------------|-----------|-----------|
|                  |                  |                | X                       | Y         | Z         |
| 1                | 8                | 0              | -1.916256               | -1.016612 | -0.130585 |
| 2                | 8                | 0              | 0.102952                | -1.109369 | 1.675138  |
| 3                | 8                | 0              | 0.755483                | -2.382996 | -0.885312 |
| 4                | 8                | 0              | 2.203678                | -0.168206 | -0.303226 |
| 5                | 7                | 0              | -0.744061               | -2.036481 | 2.231162  |
| 6                | 7                | 0              | 1.910529                | -3.021885 | -0.508939 |
| 7                | 7                | 0              | 4.444635                | -0.317223 | -0.577540 |
| 8                | 1                | 0              | 5.206608                | -0.950294 | -0.802895 |
| 9                | 7                | 0              | -3.971133               | -0.844320 | 0.767613  |
| 10               | 1                | 0              | -4.542665               | -0.890473 | 1.606495  |
| 11               | 6                | 0              | -2.676566               | -1.105053 | 0.860701  |
| 12               | 6                | 0              | -2.178128               | -1.519563 | 2.232331  |
| 13               | 1                | 0              | -2.786151               | -2.365065 | 2.587303  |
| 14               | 6                | 0              | -2.152192               | -0.389853 | 3.268296  |
| 15               | 1                | 0              | -3.127369               | -0.310560 | 3.758676  |
| 16               | 1                | 0              | -1.956224               | 0.567079  | 2.772753  |
| 17               | 6                | 0              | -1.023986               | -0.771133 | 4.246408  |
| 18               | 1                | 0              | -0.258380               | 0.007705  | 4.260602  |
| 19               | 1                | 0              | -1.383516               | -0.902447 | 5.269991  |
| 20               | 6                | 0              | -0.447409               | -2.074747 | 3.717334  |
| 21               | 1                | 0              | 0.633918                | -2.176989 | 3.830170  |
| 22               | 1                | 0              | -0.949946               | -2.962539 | 4.121413  |
| 23               | 6                | 0              | -0.604663               | -3.382351 | 1.560383  |
| 24               | 1                | 0              | -0.958920               | -3.257613 | 0.535274  |
| 25               | 1                | 0              | -1.288354               | -4.056788 | 2.089843  |
| 26               | 6                | 0              | 0.796827                | -3.980997 | 1.595522  |



|    |    |   |           |           |           |
|----|----|---|-----------|-----------|-----------|
| 27 | 1  | 0 | 0.705110  | -4.976196 | 1.139765  |
| 28 | 1  | 0 | 1.084892  | -4.183155 | 2.635966  |
| 29 | 6  | 0 | 1.977929  | -3.236088 | 0.984871  |
| 30 | 1  | 0 | 2.092751  | -2.248770 | 1.439720  |
| 31 | 1  | 0 | 2.891563  | -3.815717 | 1.163331  |
| 32 | 6  | 0 | 1.983917  | -4.306598 | -1.309564 |
| 33 | 1  | 0 | 1.008227  | -4.789761 | -1.229379 |
| 34 | 6  | 0 | 2.358174  | -3.854355 | -2.716763 |
| 35 | 1  | 0 | 1.470985  | -3.780480 | -3.349219 |
| 36 | 6  | 0 | 3.016559  | -2.470316 | -2.548472 |
| 37 | 1  | 0 | 4.000719  | -2.401799 | -3.021140 |
| 38 | 1  | 0 | 2.388473  | -1.679239 | -2.971985 |
| 39 | 6  | 0 | 3.136357  | -2.282361 | -1.036345 |
| 40 | 1  | 0 | 3.996238  | -2.845225 | -0.644329 |
| 41 | 6  | 0 | 3.223625  | -0.835328 | -0.588050 |
| 42 | 1  | 0 | 3.033156  | -4.579083 | -3.179093 |
| 43 | 1  | 0 | 2.750527  | -4.937308 | -0.843430 |
| 44 | 21 | 0 | 0.135200  | -0.503437 | -0.277681 |
| 45 | 6  | 0 | 4.874519  | 1.023630  | -0.323720 |
| 46 | 6  | 0 | 4.000070  | 2.086655  | -0.089331 |
| 47 | 6  | 0 | 4.539172  | 3.350003  | 0.132902  |
| 48 | 6  | 0 | 6.257398  | 1.219948  | -0.335064 |
| 49 | 6  | 0 | 6.775385  | 2.486751  | -0.109181 |
| 50 | 1  | 0 | 6.931262  | 0.384098  | -0.521877 |
| 51 | 1  | 0 | 7.850928  | 2.637039  | -0.119082 |
| 52 | 1  | 0 | 3.866491  | 4.183837  | 0.313413  |
| 53 | 1  | 0 | 2.926277  | 1.946503  | -0.079218 |
| 54 | 6  | 0 | -4.596115 | -0.404179 | -0.460732 |
| 55 | 6  | 0 | -4.912745 | -1.354588 | -1.427875 |
| 56 | 6  | 0 | -5.516824 | -0.936560 | -2.608999 |
| 57 | 6  | 0 | -4.870994 | 0.946825  | -0.639993 |
| 58 | 6  | 0 | -5.479116 | 1.351343  | -1.826124 |
| 59 | 1  | 0 | -4.589650 | 1.668138  | 0.123534  |
| 60 | 1  | 0 | -5.699142 | 2.403697  | -1.982208 |
| 61 | 1  | 0 | -5.780163 | -1.666987 | -3.369031 |
| 62 | 1  | 0 | -4.697226 | -2.406209 | -1.250007 |
| 63 | 16 | 0 | -1.379852 | 2.383217  | 0.048603  |
| 64 | 8  | 0 | -2.372168 | 2.049302  | 1.064060  |
| 65 | 8  | 0 | -0.154914 | 1.480457  | 0.157330  |
| 66 | 8  | 0 | -1.827520 | 2.512840  | -1.336641 |
| 67 | 6  | 0 | -0.653007 | 4.020561  | 0.528910  |
| 68 | 9  | 0 | -0.179998 | 3.934165  | 1.761353  |
| 69 | 9  | 0 | -1.599237 | 4.933896  | 0.468141  |
| 70 | 9  | 0 | 0.329402  | 4.326217  | -0.301908 |

|    |   |   |           |           |           |
|----|---|---|-----------|-----------|-----------|
| 71 | 6 | 0 | -1.463515 | 0.466545  | -2.761811 |
| 72 | 1 | 0 | -1.443070 | 1.077786  | -3.675616 |
| 73 | 1 | 0 | -2.438357 | 0.246440  | -2.295132 |
| 74 | 8 | 0 | -0.423421 | -0.004798 | -2.310794 |
| 75 | 6 | 0 | -5.798688 | 0.414982  | -2.806293 |
| 76 | 1 | 0 | -6.279440 | 0.737953  | -3.725850 |
| 77 | 6 | 0 | 5.915113  | 3.556664  | 0.125747  |
| 78 | 1 | 0 | 6.318325  | 4.550026  | 0.300263  |

### L3-CH<sub>2</sub>O-OTf

Zero-point correction= 0.95279 (a.u.)

Thermal correction to Gibbs Free Energy= 0.86310 (a.u.)

Sum of electronic and zero-point Energies= -3797.46192 (a.u.)

Sum of electronic and thermal Free Energies= -3797.55161 (a.u.)

Standard orientation:

| Center<br>Number | Atomic<br>Number | Atomic<br>Type | Coordinates (Angstroms) |           |           |
|------------------|------------------|----------------|-------------------------|-----------|-----------|
|                  |                  |                | X                       | Y         | Z         |
| 1                | 8                | 0              | -1.908114               | -0.681489 | 0.111073  |
| 2                | 8                | 0              | 0.129201                | -0.957977 | 1.838408  |
| 3                | 8                | 0              | 0.455050                | -2.486149 | -0.638352 |
| 4                | 8                | 0              | 2.251554                | -0.500306 | -0.247818 |
| 5                | 7                | 0              | -0.817580               | -1.710914 | 2.489435  |
| 6                | 7                | 0              | 1.514046                | -3.277165 | -0.272513 |
| 7                | 7                | 0              | 4.423175                | -1.007676 | -0.484913 |
| 8                | 1                | 0              | 5.114030                | -1.721437 | -0.700125 |
| 9                | 7                | 0              | -3.964509               | -0.439745 | 0.970750  |
| 10               | 1                | 0              | -4.547380               | -0.407913 | 1.802993  |
| 11               | 6                | 0              | -2.671199               | -0.681778 | 1.104328  |
| 12               | 6                | 0              | -2.169052               | -1.001484 | 2.497672  |
| 13               | 1                | 0              | -2.861274               | -1.720686 | 2.961129  |
| 14               | 6                | 0              | -1.934215               | 0.197673  | 3.418287  |
| 15               | 1                | 0              | -2.869327               | 0.472751  | 3.916516  |
| 16               | 1                | 0              | -1.608386               | 1.061863  | 2.831757  |
| 17               | 6                | 0              | -0.840589               | -0.269727 | 4.400951  |
| 18               | 1                | 0              | 0.027422                | 0.391895  | 4.338593  |
| 19               | 1                | 0              | -1.182178               | -0.274209 | 5.439052  |
| 20               | 6                | 0              | -0.465373               | -1.677907 | 3.961489  |
| 21               | 1                | 0              | 0.598545                | -1.911939 | 4.045295  |
| 22               | 1                | 0              | -1.060326               | -2.457170 | 4.454006  |
| 23               | 6                | 0              | -0.914563               | -3.103979 | 1.917377  |
| 24               | 1                | 0              | -1.301646               | -2.997392 | 0.901024  |

|    |    |   |           |           |           |
|----|----|---|-----------|-----------|-----------|
| 25 | 1  | 0 | -1.666182 | -3.625341 | 2.522823  |
| 26 | 6  | 0 | 0.373655  | -3.917351 | 1.938499  |
| 27 | 1  | 0 | 0.100142  | -4.912125 | 1.561095  |
| 28 | 1  | 0 | 0.681126  | -4.094484 | 2.978258  |
| 29 | 6  | 0 | 1.624426  | -3.419591 | 1.226541  |
| 30 | 1  | 0 | 1.932588  | -2.442384 | 1.610206  |
| 31 | 1  | 0 | 2.437401  | -4.135246 | 1.399543  |
| 32 | 6  | 0 | 1.353429  | -4.589800 | -1.009754 |
| 33 | 1  | 0 | 0.322002  | -4.917957 | -0.863269 |
| 34 | 6  | 0 | 1.716061  | -4.251485 | -2.451880 |
| 35 | 1  | 0 | 0.816885  | -4.036150 | -3.034003 |
| 36 | 6  | 0 | 2.617131  | -3.000497 | -2.373251 |
| 37 | 1  | 0 | 3.584369  | -3.132353 | -2.868048 |
| 38 | 1  | 0 | 2.130138  | -2.129521 | -2.825635 |
| 39 | 6  | 0 | 2.817320  | -2.767797 | -0.877082 |
| 40 | 1  | 0 | 3.594510  | -3.436915 | -0.479913 |
| 41 | 6  | 0 | 3.143052  | -1.338482 | -0.499809 |
| 42 | 1  | 0 | 2.221524  | -5.097303 | -2.924789 |
| 43 | 1  | 0 | 2.042956  | -5.309831 | -0.552240 |
| 44 | 21 | 0 | 0.167047  | -0.487761 | -0.156871 |
| 45 | 6  | 0 | 4.877239  | 0.342205  | -0.213912 |
| 46 | 6  | 0 | 4.917018  | 0.783571  | 1.115207  |
| 47 | 6  | 0 | 5.336624  | 2.098576  | 1.326542  |
| 48 | 6  | 0 | 5.237280  | 1.137558  | -1.312823 |
| 49 | 6  | 0 | 5.652734  | 2.439607  | -1.041387 |
| 50 | 6  | 0 | 5.108516  | 0.624958  | -2.732264 |
| 51 | 1  | 0 | 5.945163  | 3.092779  | -1.859392 |
| 52 | 1  | 0 | 5.389504  | 2.488706  | 2.340907  |
| 53 | 6  | 0 | -4.559460 | -0.161091 | -0.319889 |
| 54 | 6  | 0 | -4.660257 | -1.211192 | -1.246979 |
| 55 | 6  | 0 | -5.180107 | -0.894190 | -2.503919 |
| 56 | 6  | 0 | -4.985564 | 1.151545  | -0.580348 |
| 57 | 6  | 0 | -5.505630 | 1.405302  | -1.850430 |
| 58 | 6  | 0 | -4.959728 | 2.220310  | 0.490151  |
| 59 | 1  | 0 | -5.845796 | 2.408217  | -2.095143 |
| 60 | 1  | 0 | -5.285221 | -1.676190 | -3.253717 |
| 61 | 6  | 0 | -4.278533 | -2.646668 | -0.938110 |
| 62 | 16 | 0 | -1.012603 | 2.528817  | -0.041604 |
| 63 | 8  | 0 | -1.840299 | 2.459278  | 1.155453  |
| 64 | 8  | 0 | 0.162070  | 1.561534  | 0.036620  |
| 65 | 8  | 0 | -1.682361 | 2.457742  | -1.341774 |
| 66 | 6  | 0 | -0.156425 | 4.172072  | 0.008379  |
| 67 | 9  | 0 | 0.538814  | 4.270192  | 1.128075  |
| 68 | 9  | 0 | -1.082059 | 5.111477  | -0.033581 |

|     |   |   |           |           |           |
|-----|---|---|-----------|-----------|-----------|
| 69  | 9 | 0 | 0.650894  | 4.283505  | -1.031060 |
| 70  | 6 | 0 | -5.590300 | 0.399088  | -2.805338 |
| 71  | 1 | 0 | -5.998061 | 0.620535  | -3.788455 |
| 72  | 6 | 0 | 5.696814  | 2.916038  | 0.264291  |
| 73  | 1 | 0 | 6.021908  | 3.935453  | 0.454822  |
| 74  | 6 | 0 | -6.245513 | 2.143564  | 1.320530  |
| 75  | 6 | 0 | -4.766017 | 3.628383  | -0.060452 |
| 76  | 1 | 0 | -7.121365 | 2.348400  | 0.691827  |
| 77  | 1 | 0 | -6.229677 | 2.887855  | 2.124619  |
| 78  | 1 | 0 | -6.404787 | 1.156006  | 1.776536  |
| 79  | 1 | 0 | -4.583184 | 4.324488  | 0.765403  |
| 80  | 1 | 0 | -3.909263 | 3.678588  | -0.742260 |
| 81  | 1 | 0 | -5.655736 | 3.988855  | -0.591581 |
| 82  | 1 | 0 | -4.099581 | 2.023174  | 1.145235  |
| 83  | 6 | 0 | -5.479318 | -3.579473 | -1.101977 |
| 84  | 1 | 0 | -3.970412 | -2.705977 | 0.118087  |
| 85  | 6 | 0 | -3.103386 | -3.128275 | -1.792125 |
| 86  | 1 | 0 | -6.337351 | -3.242874 | -0.510302 |
| 87  | 1 | 0 | -5.801631 | -3.636001 | -2.148389 |
| 88  | 1 | 0 | -2.858500 | -4.170699 | -1.547164 |
| 89  | 1 | 0 | -2.202959 | -2.518791 | -1.639504 |
| 90  | 1 | 0 | -5.222646 | -4.597078 | -0.785416 |
| 91  | 1 | 0 | -3.356445 | -3.101125 | -2.859584 |
| 92  | 6 | 0 | 3.688595  | 0.878357  | -3.251992 |
| 93  | 6 | 0 | 6.135273  | 1.215837  | -3.691318 |
| 94  | 6 | 0 | 4.534968  | -0.086340 | 2.294416  |
| 95  | 6 | 0 | 3.266620  | 0.427324  | 2.980950  |
| 96  | 6 | 0 | 5.680894  | -0.209105 | 3.298960  |
| 97  | 1 | 0 | 4.325859  | -1.102791 | 1.922890  |
| 98  | 1 | 0 | 5.273086  | -0.465244 | -2.718421 |
| 99  | 1 | 0 | 6.076543  | 0.710715  | -4.661413 |
| 100 | 1 | 0 | 7.157946  | 1.109101  | -3.314078 |
| 101 | 1 | 0 | 3.555347  | 0.440019  | -4.248800 |
| 102 | 1 | 0 | 2.913898  | 0.477239  | -2.583528 |
| 103 | 1 | 0 | 3.508400  | 1.957845  | -3.334422 |
| 104 | 1 | 0 | 5.903988  | 0.755714  | 3.769216  |
| 105 | 1 | 0 | 6.601512  | -0.566092 | 2.824633  |
| 106 | 1 | 0 | 2.973050  | -0.253950 | 3.792075  |
| 107 | 1 | 0 | 3.436819  | 1.413138  | 3.431015  |
| 108 | 1 | 0 | 5.950491  | 2.280484  | -3.877571 |
| 109 | 1 | 0 | 5.416557  | -0.907491 | 4.101530  |
| 110 | 1 | 0 | 2.424647  | 0.522917  | 2.283225  |
| 111 | 6 | 0 | -1.397695 | 0.403816  | -2.697675 |
| 112 | 1 | 0 | -1.325872 | 0.965312  | -3.640684 |

|     |   |   |           |           |           |
|-----|---|---|-----------|-----------|-----------|
| 113 | 1 | 0 | -2.391302 | 0.278840  | -2.235858 |
| 114 | 8 | 0 | -0.396016 | -0.120106 | -2.216358 |

**L3-CH<sub>2</sub>O-OiPr**

Zero-point correction= 1.01868 (a.u.)

Thermal correction to Gibbs Free Energy= 0.93372 (a.u.)

Sum of electronic and zero-point Energies= -3029.79182 (a.u.)

Sum of electronic and thermal Free Energies= -3029.87678 (a.u.)

Standard orientation:

| Center<br>Number | Atomic<br>Number | Atomic<br>Type | Coordinates (Angstroms) |           |           |
|------------------|------------------|----------------|-------------------------|-----------|-----------|
|                  |                  |                | X                       | Y         | Z         |
| 1                | 8                | 0              | -2.197921               | -0.422993 | 0.006976  |
| 2                | 8                | 0              | -0.102858               | -1.044349 | 1.660544  |
| 3                | 8                | 0              | 0.083676                | -2.040369 | -1.103235 |
| 4                | 8                | 0              | 2.020394                | -0.242923 | -0.428047 |
| 5                | 7                | 0              | -1.080030               | -1.874954 | 2.140871  |
| 6                | 7                | 0              | 1.102417                | -2.936017 | -0.943955 |
| 7                | 7                | 0              | 4.147172                | -0.857991 | -0.766350 |
| 8                | 1                | 0              | 4.791440                | -1.564072 | -1.109894 |
| 9                | 7                | 0              | -4.098679               | 0.064907  | 1.089166  |
| 10               | 1                | 0              | -4.632112               | 0.012588  | 1.952164  |
| 11               | 6                | 0              | -2.881558               | -0.464827 | 1.045976  |
| 12               | 6                | 0              | -2.380238               | -1.105363 | 2.323964  |
| 13               | 1                | 0              | -3.120179               | -1.843840 | 2.669779  |
| 14               | 6                | 0              | -2.030026               | -0.119775 | 3.438828  |
| 15               | 1                | 0              | -2.930464               | 0.192739  | 3.977355  |
| 16               | 1                | 0              | -1.567346               | 0.772897  | 3.001758  |
| 17               | 6                | 0              | -1.026812               | -0.884351 | 4.325831  |
| 18               | 1                | 0              | -0.116618               | -0.295114 | 4.463891  |
| 19               | 1                | 0              | -1.433440               | -1.103859 | 5.316512  |
| 20               | 6                | 0              | -0.722302               | -2.179793 | 3.579465  |
| 21               | 1                | 0              | 0.329750                | -2.473288 | 3.591168  |
| 22               | 1                | 0              | -1.348447               | -3.020165 | 3.904085  |
| 23               | 6                | 0              | -1.261975               | -3.110045 | 1.288555  |
| 24               | 1                | 0              | -1.642910               | -2.764836 | 0.324762  |
| 25               | 1                | 0              | -2.036065               | -3.707000 | 1.786964  |
| 26               | 6                | 0              | -0.015117               | -3.968037 | 1.117032  |
| 27               | 1                | 0              | -0.338008               | -4.851169 | 0.548777  |
| 28               | 1                | 0              | 0.297477                | -4.366733 | 2.091833  |
| 29               | 6                | 0              | 1.244146                | -3.384437 | 0.490225  |
| 30               | 1                | 0              | 1.591099                | -2.516828 | 1.058234  |

|    |    |   |           |           |           |
|----|----|---|-----------|-----------|-----------|
| 31 | 1  | 0 | 2.030537  | -4.149579 | 0.495782  |
| 32 | 6  | 0 | 0.857482  | -4.068769 | -1.917019 |
| 33 | 1  | 0 | -0.185616 | -4.369873 | -1.801649 |
| 34 | 6  | 0 | 1.198140  | -3.468287 | -3.277514 |
| 35 | 1  | 0 | 0.294548  | -3.113138 | -3.777659 |
| 36 | 6  | 0 | 2.147770  | -2.287267 | -2.985121 |
| 37 | 1  | 0 | 3.086773  | -2.338107 | -3.544806 |
| 38 | 1  | 0 | 1.668102  | -1.329008 | -3.215992 |
| 39 | 6  | 0 | 2.415915  | -2.384213 | -1.485282 |
| 40 | 1  | 0 | 3.166200  | -3.160993 | -1.275513 |
| 41 | 6  | 0 | 2.839625  | -1.084285 | -0.838470 |
| 42 | 1  | 0 | 1.659994  | -4.221852 | -3.920663 |
| 43 | 1  | 0 | 1.519751  | -4.897557 | -1.637144 |
| 44 | 21 | 0 | -0.093171 | -0.086122 | -0.203489 |
| 45 | 6  | 0 | 4.662964  | 0.387442  | -0.237036 |
| 46 | 6  | 0 | 4.841832  | 0.497219  | 1.149377  |
| 47 | 6  | 0 | 5.254951  | 1.738838  | 1.636067  |
| 48 | 6  | 0 | 4.905247  | 1.434969  | -1.137944 |
| 49 | 6  | 0 | 5.313745  | 2.653726  | -0.595910 |
| 50 | 6  | 0 | 4.707236  | 1.267140  | -2.631486 |
| 51 | 1  | 0 | 5.514608  | 3.494449  | -1.255872 |
| 52 | 1  | 0 | 5.404216  | 1.873640  | 2.705686  |
| 53 | 6  | 0 | -4.639577 | 0.797841  | -0.035907 |
| 54 | 6  | 0 | -5.305676 | 0.089964  | -1.043844 |
| 55 | 6  | 0 | -5.789191 | 0.831117  | -2.126840 |
| 56 | 6  | 0 | -4.415413 | 2.185624  | -0.078428 |
| 57 | 6  | 0 | -4.930322 | 2.876041  | -1.175813 |
| 58 | 6  | 0 | -3.671726 | 2.897237  | 1.034301  |
| 59 | 1  | 0 | -4.798212 | 3.952311  | -1.246064 |
| 60 | 1  | 0 | -6.320581 | 0.321847  | -2.928051 |
| 61 | 6  | 0 | -5.470700 | -1.414797 | -1.018802 |
| 62 | 6  | 0 | -5.611812 | 2.206125  | -2.188347 |
| 63 | 1  | 0 | -6.010176 | 2.765496  | -3.031177 |
| 64 | 6  | 0 | 5.476373  | 2.806966  | 0.776347  |
| 65 | 1  | 0 | 5.796776  | 3.765199  | 1.177425  |
| 66 | 6  | 0 | -4.600614 | 3.146516  | 2.225717  |
| 67 | 6  | 0 | -3.026399 | 4.205393  | 0.593523  |
| 68 | 1  | 0 | -5.429753 | 3.801803  | 1.930690  |
| 69 | 1  | 0 | -4.061535 | 3.636618  | 3.044832  |
| 70 | 1  | 0 | -5.046004 | 2.224198  | 2.621518  |
| 71 | 1  | 0 | -2.419481 | 4.613331  | 1.409578  |
| 72 | 1  | 0 | -2.371369 | 4.064260  | -0.276443 |
| 73 | 1  | 0 | -3.772458 | 4.969691  | 0.344378  |
| 74 | 1  | 0 | -2.850616 | 2.236455  | 1.361679  |

|     |   |   |           |           |           |
|-----|---|---|-----------|-----------|-----------|
| 75  | 6 | 0 | -6.900762 | -1.850593 | -1.328949 |
| 76  | 1 | 0 | -5.235486 | -1.769602 | -0.003851 |
| 77  | 6 | 0 | -4.481543 | -2.073780 | -1.985548 |
| 78  | 1 | 0 | -7.628175 | -1.355222 | -0.677031 |
| 79  | 1 | 0 | -7.175959 | -1.628804 | -2.366927 |
| 80  | 1 | 0 | -4.565984 | -3.166281 | -1.936699 |
| 81  | 1 | 0 | -3.442965 | -1.791785 | -1.762944 |
| 82  | 1 | 0 | -7.005202 | -2.932906 | -1.195024 |
| 83  | 1 | 0 | -4.697813 | -1.775662 | -3.019845 |
| 84  | 6 | 0 | 3.306543  | 1.721828  | -3.052827 |
| 85  | 6 | 0 | 5.767597  | 1.988314  | -3.458520 |
| 86  | 6 | 0 | 4.597681  | -0.657196 | 2.100808  |
| 87  | 6 | 0 | 3.308383  | -0.457960 | 2.903294  |
| 88  | 6 | 0 | 5.782294  | -0.891069 | 3.036763  |
| 89  | 1 | 0 | 4.477318  | -1.573239 | 1.500886  |
| 90  | 1 | 0 | 4.795698  | 0.194095  | -2.864532 |
| 91  | 1 | 0 | 5.664133  | 1.722419  | -4.516187 |
| 92  | 1 | 0 | 6.782526  | 1.727151  | -3.140293 |
| 93  | 1 | 0 | 3.141131  | 1.521129  | -4.118532 |
| 94  | 1 | 0 | 2.510954  | 1.228989  | -2.475824 |
| 95  | 1 | 0 | 3.198113  | 2.803884  | -2.898989 |
| 96  | 1 | 0 | 5.908379  | -0.063466 | 3.744696  |
| 97  | 1 | 0 | 6.721420  | -1.001976 | 2.484182  |
| 98  | 1 | 0 | 3.125846  | -1.328710 | 3.548365  |
| 99  | 1 | 0 | 3.389763  | 0.421578  | 3.555823  |
| 100 | 1 | 0 | 5.662915  | 3.077802  | -3.394184 |
| 101 | 1 | 0 | 5.625877  | -1.799899 | 3.629095  |
| 102 | 1 | 0 | 2.431705  | -0.305494 | 2.258287  |
| 103 | 6 | 0 | -1.659520 | 1.196465  | -2.604146 |
| 104 | 1 | 0 | -1.834094 | 1.462318  | -3.659986 |
| 105 | 1 | 0 | -2.373411 | 1.576592  | -1.846256 |
| 106 | 8 | 0 | -0.706252 | 0.502812  | -2.296289 |
| 107 | 8 | 0 | -0.064251 | 1.688323  | 0.361358  |
| 108 | 6 | 0 | 0.513936  | 2.897584  | 0.786418  |
| 109 | 1 | 0 | -0.292983 | 3.534691  | 1.191691  |
| 110 | 6 | 0 | 1.522808  | 2.620007  | 1.885765  |
| 111 | 1 | 0 | 2.328614  | 1.980474  | 1.497459  |
| 112 | 1 | 0 | 1.973222  | 3.547926  | 2.258617  |
| 113 | 1 | 0 | 1.048496  | 2.103579  | 2.730703  |
| 114 | 6 | 0 | 1.153537  | 3.602203  | -0.395254 |
| 115 | 1 | 0 | 0.423392  | 3.761398  | -1.199288 |
| 116 | 1 | 0 | 1.559948  | 4.578170  | -0.105261 |
| 117 | 1 | 0 | 1.979323  | 2.990991  | -0.786876 |

### L3-PhCHO-OTf

Zero-point correction= 1.03459 (a.u.)

Thermal correction to Gibbs Free Energy= 0.93960 (a.u.)

Sum of electronic and zero-point Energies= -4028.30050 (a.u.)

Sum of electronic and thermal Free Energies= -4028.39549 (a.u.)

Standard orientation:

| Center<br>Number | Atomic<br>Number | Atomic<br>Type | Coordinates (Angstroms) |           |           |
|------------------|------------------|----------------|-------------------------|-----------|-----------|
|                  |                  |                | X                       | Y         | Z         |
| 1                | 8                | 0              | -1.757156               | -1.008768 | -0.334593 |
| 2                | 8                | 0              | 0.389249                | -2.465870 | 0.351083  |
| 3                | 8                | 0              | 0.634370                | -1.241613 | -2.292154 |
| 4                | 8                | 0              | 2.381445                | -0.306513 | -0.419975 |
| 5                | 7                | 0              | -0.479573               | -3.491200 | 0.067891  |
| 6                | 7                | 0              | 1.747957                | -1.898164 | -2.744649 |
| 7                | 7                | 0              | 4.549913                | -0.239783 | -1.007370 |
| 8                | 1                | 0              | 5.234862                | -0.412306 | -1.737751 |
| 9                | 7                | 0              | -3.759561               | -1.756212 | 0.342915  |
| 10               | 1                | 0              | -4.280449               | -2.485988 | 0.822006  |
| 11               | 6                | 0              | -2.452107               | -1.903452 | 0.192965  |
| 12               | 6                | 0              | -1.864593               | -3.223925 | 0.648915  |
| 13               | 1                | 0              | -2.494196               | -4.034550 | 0.252124  |
| 14               | 6                | 0              | -1.671996               | -3.382111 | 2.160806  |
| 15               | 1                | 0              | -2.585131               | -3.790404 | 2.606376  |
| 16               | 1                | 0              | -1.483590               | -2.408947 | 2.623517  |
| 17               | 6                | 0              | -0.461419               | -4.325176 | 2.311081  |
| 18               | 1                | 0              | 0.352280                | -3.810930 | 2.829435  |
| 19               | 1                | 0              | -0.699579               | -5.228561 | 2.878186  |
| 20               | 6                | 0              | -0.043582               | -4.682844 | 0.894442  |
| 21               | 1                | 0              | 1.033439                | -4.799553 | 0.752040  |
| 22               | 1                | 0              | -0.571800               | -5.560215 | 0.500065  |
| 23               | 6                | 0              | -0.546077               | -3.777522 | -1.413156 |
| 24               | 1                | 0              | -0.972959               | -2.886206 | -1.882035 |
| 25               | 1                | 0              | -1.249496               | -4.610921 | -1.529813 |
| 26               | 6                | 0              | 0.775272                | -4.163077 | -2.065738 |
| 27               | 1                | 0              | 0.530638                | -4.411975 | -3.107430 |
| 28               | 1                | 0              | 1.140902                | -5.106773 | -1.638587 |
| 29               | 6                | 0              | 1.959750                | -3.207922 | -2.026302 |
| 30               | 1                | 0              | 2.224845                | -2.958081 | -0.993707 |
| 31               | 1                | 0              | 2.821557                | -3.684413 | -2.509687 |
| 32               | 6                | 0              | 1.593724                | -2.028319 | -4.245102 |
| 33               | 1                | 0              | 0.592345                | -2.422269 | -4.431330 |



|    |    |   |           |           |           |
|----|----|---|-----------|-----------|-----------|
| 34 | 6  | 0 | 1.825967  | -0.611929 | -4.760945 |
| 35 | 1  | 0 | 0.872857  | -0.098099 | -4.907582 |
| 36 | 6  | 0 | 2.654205  | 0.098480  | -3.669804 |
| 37 | 1  | 0 | 3.575933  | 0.551536  | -4.048288 |
| 38 | 1  | 0 | 2.067892  | 0.884621  | -3.179762 |
| 39 | 6  | 0 | 2.975831  | -1.003512 | -2.662132 |
| 40 | 1  | 0 | 3.809647  | -1.626494 | -3.017364 |
| 41 | 6  | 0 | 3.277598  | -0.502217 | -1.265916 |
| 42 | 1  | 0 | 2.342890  | -0.638047 | -5.723633 |
| 43 | 1  | 0 | 2.348393  | -2.744257 | -4.593379 |
| 44 | 21 | 0 | 0.289484  | -0.522846 | -0.362363 |
| 45 | 6  | 0 | 5.009654  | 0.346180  | 0.233900  |
| 46 | 6  | 0 | 5.051494  | -0.447590 | 1.386764  |
| 47 | 6  | 0 | 5.498178  | 0.169717  | 2.557564  |
| 48 | 6  | 0 | 5.402483  | 1.694171  | 0.199035  |
| 49 | 6  | 0 | 5.846248  | 2.255386  | 1.394182  |
| 50 | 6  | 0 | 5.288183  | 2.511596  | -1.072050 |
| 51 | 1  | 0 | 6.164960  | 3.294079  | 1.417018  |
| 52 | 1  | 0 | 5.548328  | -0.404455 | 3.480503  |
| 53 | 6  | 0 | -4.461687 | -0.560371 | -0.070712 |
| 54 | 6  | 0 | -4.635122 | -0.322314 | -1.443438 |
| 55 | 6  | 0 | -5.299261 | 0.854203  | -1.799722 |
| 56 | 6  | 0 | -4.939811 | 0.296804  | 0.933849  |
| 57 | 6  | 0 | -5.606589 | 1.449738  | 0.518378  |
| 58 | 6  | 0 | -4.807044 | -0.057688 | 2.398159  |
| 59 | 1  | 0 | -5.997776 | 2.137172  | 1.264078  |
| 60 | 1  | 0 | -5.463435 | 1.080510  | -2.851558 |
| 61 | 6  | 0 | -4.178630 | -1.279550 | -2.527760 |
| 62 | 16 | 0 | -0.926871 | 0.849126  | 2.332088  |
| 63 | 8  | 0 | -1.605608 | -0.303574 | 2.914620  |
| 64 | 8  | 0 | 0.242419  | 0.416575  | 1.455839  |
| 65 | 8  | 0 | -1.740181 | 1.873788  | 1.690042  |
| 66 | 6  | 0 | -0.020342 | 1.674441  | 3.718467  |
| 67 | 9  | 0 | 0.793601  | 0.802281  | 4.292295  |
| 68 | 9  | 0 | -0.903737 | 2.109912  | 4.597398  |
| 69 | 9  | 0 | 0.681301  | 2.690238  | 3.244315  |
| 70 | 6  | 0 | -5.779538 | 1.728120  | -0.832708 |
| 71 | 1  | 0 | -6.310241 | 2.628107  | -1.135589 |
| 72 | 6  | 0 | 5.887228  | 1.501600  | 2.562440  |
| 73 | 1  | 0 | 6.234432  | 1.957986  | 3.485755  |
| 74 | 6  | 0 | -5.964659 | -0.974002 | 2.809464  |
| 75 | 6  | 0 | -4.734945 | 1.155680  | 3.317383  |
| 76 | 1  | 0 | -6.925183 | -0.454861 | 2.697547  |
| 77 | 1  | 0 | -5.866240 | -1.274726 | 3.858633  |

|     |   |   |           |           |           |
|-----|---|---|-----------|-----------|-----------|
| 78  | 1 | 0 | -6.026011 | -1.888028 | 2.200718  |
| 79  | 1 | 0 | -4.473739 | 0.832481  | 4.331148  |
| 80  | 1 | 0 | -3.972186 | 1.868965  | 2.982443  |
| 81  | 1 | 0 | -5.697881 | 1.677638  | 3.386778  |
| 82  | 1 | 0 | -3.860962 | -0.602103 | 2.527601  |
| 83  | 6 | 0 | -5.343569 | -1.702008 | -3.423409 |
| 84  | 1 | 0 | -3.800682 | -2.195318 | -2.046403 |
| 85  | 6 | 0 | -3.042404 | -0.687834 | -3.365328 |
| 86  | 1 | 0 | -6.179636 | -2.103083 | -2.840547 |
| 87  | 1 | 0 | -5.723702 | -0.858961 | -4.011919 |
| 88  | 1 | 0 | -2.719039 | -1.403285 | -4.133409 |
| 89  | 1 | 0 | -2.173099 | -0.428012 | -2.749080 |
| 90  | 1 | 0 | -5.020892 | -2.472476 | -4.133223 |
| 91  | 1 | 0 | -3.372494 | 0.220420  | -3.886458 |
| 92  | 6 | 0 | 3.857910  | 3.037383  | -1.234563 |
| 93  | 6 | 0 | 6.283479  | 3.662809  | -1.152722 |
| 94  | 6 | 0 | 4.643494  | -1.905767 | 1.408878  |
| 95  | 6 | 0 | 3.380386  | -2.113445 | 2.247479  |
| 96  | 6 | 0 | 5.778986  | -2.802459 | 1.900734  |
| 97  | 1 | 0 | 4.413887  | -2.214810 | 0.376297  |
| 98  | 1 | 0 | 5.500847  | 1.846497  | -1.926347 |
| 99  | 1 | 0 | 6.241968  | 4.124726  | -2.145000 |
| 100 | 1 | 0 | 7.311886  | 3.329533  | -0.977279 |
| 101 | 1 | 0 | 3.748288  | 3.570143  | -2.187938 |
| 102 | 1 | 0 | 3.106285  | 2.237092  | -1.192721 |
| 103 | 1 | 0 | 3.620914  | 3.740080  | -0.425436 |
| 104 | 1 | 0 | 6.026400  | -2.594627 | 2.948375  |
| 105 | 1 | 0 | 6.692263  | -2.664022 | 1.311760  |
| 106 | 1 | 0 | 3.023965  | -3.148675 | 2.153294  |
| 107 | 1 | 0 | 3.581059  | -1.929042 | 3.310096  |
| 108 | 1 | 0 | 6.052117  | 4.450989  | -0.426099 |
| 109 | 1 | 0 | 5.489190  | -3.858184 | 1.840723  |
| 110 | 1 | 0 | 2.571019  | -1.440226 | 1.941333  |
| 111 | 6 | 0 | -1.424660 | 1.941532  | -1.113585 |
| 112 | 1 | 0 | -2.323805 | 1.455183  | -0.693765 |
| 113 | 8 | 0 | -0.388649 | 1.259747  | -1.273651 |
| 114 | 6 | 0 | -1.526502 | 3.331054  | -1.450506 |
| 115 | 6 | 0 | -2.727260 | 3.993905  | -1.147924 |
| 116 | 6 | 0 | -0.456526 | 4.028292  | -2.040530 |
| 117 | 6 | 0 | -2.860236 | 5.343265  | -1.438554 |
| 118 | 1 | 0 | -3.534543 | 3.439185  | -0.669731 |
| 119 | 6 | 0 | -0.599329 | 5.371094  | -2.335388 |
| 120 | 1 | 0 | 0.470012  | 3.499796  | -2.254252 |
| 121 | 6 | 0 | -1.799876 | 6.024923  | -2.033848 |

|     |   |   |           |          |           |
|-----|---|---|-----------|----------|-----------|
| 122 | 1 | 0 | -3.780204 | 5.869118 | -1.200589 |
| 123 | 1 | 0 | 0.215321  | 5.922810 | -2.795896 |
| 124 | 1 | 0 | -1.904470 | 7.082396 | -2.263579 |

**L3- chalcone-OTf**

Zero-point correction= 1.15083 (a.u.)

Thermal correction to Gibbs Free Energy= 1.05254 (a.u.)

Sum of electronic and zero-point Energies= -4336.44024 (a.u.)

Sum of electronic and thermal Free Energies= -4336.53852 (a.u.)

Standard orientation:

| Center<br>Number | Atomic<br>Number | Atomic<br>Type | Coordinates (Angstroms) |           |           |
|------------------|------------------|----------------|-------------------------|-----------|-----------|
|                  |                  |                | X                       | Y         | Z         |
| 1                | 8                | 0              | 2.378625                | -0.873608 | 0.010301  |
| 2                | 8                | 0              | 0.656375                | -2.670028 | -1.061011 |
| 3                | 8                | 0              | 0.396658                | -2.333850 | 1.811393  |
| 4                | 8                | 0              | -1.765979               | -1.465918 | 0.384235  |
| 5                | 7                | 0              | 1.813618                | -3.407588 | -1.111192 |
| 6                | 7                | 0              | -0.416646               | -3.397113 | 2.089143  |
| 7                | 7                | 0              | -3.757261               | -2.342390 | 0.954292  |
| 8                | 1                | 0              | -4.258976               | -2.941742 | 1.602601  |
| 9                | 7                | 0              | 4.446274                | -0.802066 | -0.858474 |
| 10               | 1                | 0              | 5.096514                | -1.191408 | -1.535522 |
| 11               | 6                | 0              | 3.240123                | -1.339752 | -0.765617 |
| 12               | 6                | 0              | 2.984625                | -2.569764 | -1.614320 |
| 13               | 1                | 0              | 3.858707                | -3.233820 | -1.534978 |
| 14               | 6                | 0              | 2.636632                | -2.318295 | -3.080687 |
| 15               | 1                | 0              | 3.552413                | -2.178300 | -3.664292 |
| 16               | 1                | 0              | 2.046923                | -1.401887 | -3.173958 |
| 17               | 6                | 0              | 1.831595                | -3.561762 | -3.506953 |
| 18               | 1                | 0              | 0.859211                | -3.259259 | -3.903682 |
| 19               | 1                | 0              | 2.337707                | -4.144175 | -4.281304 |
| 20               | 6                | 0              | 1.661934                | -4.398908 | -2.245329 |
| 21               | 1                | 0              | 0.680369                | -4.865987 | -2.134000 |
| 22               | 1                | 0              | 2.448832                | -5.154296 | -2.124800 |
| 23               | 6                | 0              | 2.135155                | -4.056013 | 0.213119  |
| 24               | 1                | 0              | 2.335636                | -3.243283 | 0.915152  |
| 25               | 1                | 0              | 3.059364                | -4.625430 | 0.056221  |
| 26               | 6                | 0              | 1.067969                | -4.996691 | 0.753448  |
| 27               | 1                | 0              | 1.490668                | -5.441157 | 1.664722  |
| 28               | 1                | 0              | 0.937067                | -5.843685 | 0.066516  |
| 29               | 6                | 0              | -0.332009               | -4.473514 | 1.034378  |

|    |    |   |           |           |           |
|----|----|---|-----------|-----------|-----------|
| 30 | 1  | 0 | -0.776702 | -4.055617 | 0.126541  |
| 31 | 1  | 0 | -0.958898 | -5.299271 | 1.392524  |
| 32 | 6  | 0 | -0.057677 | -3.867304 | 3.482621  |
| 33 | 1  | 0 | 1.029232  | -3.969190 | 3.518438  |
| 34 | 6  | 0 | -0.623894 | -2.781443 | 4.389942  |
| 35 | 1  | 0 | 0.143953  | -2.039078 | 4.619821  |
| 36 | 6  | 0 | -1.772475 | -2.128417 | 3.590857  |
| 37 | 1  | 0 | -2.732302 | -2.154973 | 4.116817  |
| 38 | 1  | 0 | -1.545749 | -1.081712 | 3.359749  |
| 39 | 6  | 0 | -1.854460 | -2.946259 | 2.302406  |
| 40 | 1  | 0 | -2.421000 | -3.873460 | 2.471270  |
| 41 | 6  | 0 | -2.446996 | -2.200651 | 1.124022  |
| 42 | 1  | 0 | -0.966736 | -3.212709 | 5.333872  |
| 43 | 1  | 0 | -0.529982 | -4.846253 | 3.633055  |
| 44 | 21 | 0 | 0.301957  | -1.016918 | 0.192754  |
| 45 | 6  | 0 | -4.542640 | -1.601472 | -0.005954 |
| 46 | 6  | 0 | -4.371822 | -1.845733 | -1.374906 |
| 47 | 6  | 0 | -5.181482 | -1.117862 | -2.251587 |
| 48 | 6  | 0 | -5.484616 | -0.690527 | 0.508530  |
| 49 | 6  | 0 | -6.284066 | -0.016498 | -0.411351 |
| 50 | 6  | 0 | -5.579160 | -0.416760 | 1.996927  |
| 51 | 1  | 0 | -7.037595 | 0.682737  | -0.058271 |
| 52 | 1  | 0 | -5.079938 | -1.274160 | -3.323476 |
| 53 | 6  | 0 | 4.850505  | 0.383078  | -0.133526 |
| 54 | 6  | 0 | 5.015904  | 0.307519  | 1.258057  |
| 55 | 6  | 0 | 5.436888  | 1.470750  | 1.905445  |
| 56 | 6  | 0 | 5.079230  | 1.550283  | -0.879383 |
| 57 | 6  | 0 | 5.499757  | 2.680508  | -0.178696 |
| 58 | 6  | 0 | 4.950443  | 1.570711  | -2.386160 |
| 59 | 1  | 0 | 5.691199  | 3.602724  | -0.721726 |
| 60 | 1  | 0 | 5.587664  | 1.455881  | 2.983765  |
| 61 | 6  | 0 | 4.784457  | -0.952109 | 2.069020  |
| 62 | 16 | 0 | 0.868633  | 1.323103  | -1.999184 |
| 63 | 8  | 0 | 1.880944  | 0.709769  | -2.852635 |
| 64 | 8  | 0 | -0.043981 | 0.268621  | -1.376409 |
| 65 | 8  | 0 | 1.288139  | 2.330245  | -1.038163 |
| 66 | 6  | 0 | -0.328683 | 2.140270  | -3.149237 |
| 67 | 9  | 0 | -0.816357 | 1.246348  | -3.996860 |
| 68 | 9  | 0 | 0.302721  | 3.090519  | -3.813802 |
| 69 | 9  | 0 | -1.326614 | 2.670736  | -2.453849 |
| 70 | 6  | 0 | 5.679896  | 2.640983  | 1.197591  |
| 71 | 1  | 0 | 6.022297  | 3.530385  | 1.722432  |
| 72 | 6  | 0 | -6.129775 | -0.223817 | -1.778733 |
| 73 | 1  | 0 | -6.765954 | 0.309253  | -2.481735 |

|     |   |   |           |           |           |
|-----|---|---|-----------|-----------|-----------|
| 74  | 6 | 0 | 6.302071  | 1.239074  | -3.026243 |
| 75  | 6 | 0 | 4.405445  | 2.888936  | -2.924296 |
| 76  | 1 | 0 | 7.048808  | 2.000082  | -2.766024 |
| 77  | 1 | 0 | 6.217747  | 1.211684  | -4.118717 |
| 78  | 1 | 0 | 6.704222  | 0.271750  | -2.692353 |
| 79  | 1 | 0 | 4.162564  | 2.780988  | -3.987225 |
| 80  | 1 | 0 | 3.493488  | 3.190193  | -2.395321 |
| 81  | 1 | 0 | 5.139118  | 3.700679  | -2.841911 |
| 82  | 1 | 0 | 4.224525  | 0.798438  | -2.672614 |
| 83  | 6 | 0 | 6.042720  | -1.366019 | 2.831997  |
| 84  | 1 | 0 | 4.550095  | -1.773713 | 1.374417  |
| 85  | 6 | 0 | 3.596786  | -0.795984 | 3.022775  |
| 86  | 1 | 0 | 6.905500  | -1.470257 | 2.164903  |
| 87  | 1 | 0 | 6.306210  | -0.630341 | 3.600871  |
| 88  | 1 | 0 | 3.402699  | -1.744010 | 3.543590  |
| 89  | 1 | 0 | 2.679976  | -0.491690 | 2.499969  |
| 90  | 1 | 0 | 5.885837  | -2.324415 | 3.341217  |
| 91  | 1 | 0 | 3.808849  | -0.043178 | 3.793045  |
| 92  | 6 | 0 | -4.451899 | 0.527389  | 2.427440  |
| 93  | 6 | 0 | -6.924025 | 0.147688  | 2.437327  |
| 94  | 6 | 0 | -3.397721 | -2.857318 | -1.937655 |
| 95  | 6 | 0 | -2.347235 | -2.186556 | -2.824747 |
| 96  | 6 | 0 | -4.129485 | -3.963927 | -2.697232 |
| 97  | 1 | 0 | -2.869753 | -3.338697 | -1.101334 |
| 98  | 1 | 0 | -5.444464 | -1.371268 | 2.534531  |
| 99  | 1 | 0 | -6.966017 | 0.204395  | 3.530119  |
| 100 | 1 | 0 | -7.762622 | -0.470294 | 2.099030  |
| 101 | 1 | 0 | -4.462532 | 0.679662  | 3.513666  |
| 102 | 1 | 0 | -3.457190 | 0.157372  | 2.140696  |
| 103 | 1 | 0 | -4.583945 | 1.508127  | 1.949008  |
| 104 | 1 | 0 | -4.658662 | -3.564841 | -3.570605 |
| 105 | 1 | 0 | -4.868251 | -4.471694 | -2.066826 |
| 106 | 1 | 0 | -1.560762 | -2.905963 | -3.088631 |
| 107 | 1 | 0 | -2.792916 | -1.826854 | -3.760541 |
| 108 | 1 | 0 | -7.074859 | 1.167072  | 2.060213  |
| 109 | 1 | 0 | -3.417422 | -4.713064 | -3.063601 |
| 110 | 1 | 0 | -1.873345 | -1.329206 | -2.331848 |
| 111 | 6 | 0 | -0.238802 | 1.754521  | 1.618486  |
| 112 | 8 | 0 | 0.218888  | 0.576394  | 1.492809  |
| 113 | 6 | 0 | 0.528349  | 2.699554  | 2.435558  |
| 114 | 6 | 0 | -0.104385 | 3.581796  | 3.324546  |
| 115 | 6 | 0 | 1.928844  | 2.678409  | 2.355877  |
| 116 | 6 | 0 | 0.652597  | 4.433133  | 4.119482  |
| 117 | 1 | 0 | -1.187309 | 3.565946  | 3.426894  |

|     |   |   |           |          |           |
|-----|---|---|-----------|----------|-----------|
| 118 | 6 | 0 | 2.675055  | 3.551083 | 3.133576  |
| 119 | 1 | 0 | 2.419379  | 2.002355 | 1.655366  |
| 120 | 6 | 0 | 2.041277  | 4.424963 | 4.016701  |
| 121 | 1 | 0 | 0.160706  | 5.099747 | 4.822427  |
| 122 | 1 | 0 | 3.758851  | 3.552305 | 3.048317  |
| 123 | 1 | 0 | 2.633587  | 5.098784 | 4.630482  |
| 124 | 6 | 0 | -1.473434 | 2.093601 | 0.972418  |
| 125 | 1 | 0 | -2.029208 | 1.253603 | 0.552730  |
| 126 | 6 | 0 | -1.889382 | 3.371200 | 0.760007  |
| 127 | 1 | 0 | -1.248856 | 4.180500 | 1.115055  |
| 128 | 6 | 0 | -3.091593 | 3.789688 | 0.080481  |
| 129 | 6 | 0 | -3.359829 | 5.167197 | -0.001531 |
| 130 | 6 | 0 | -4.000293 | 2.884629 | -0.502670 |
| 131 | 6 | 0 | -4.503469 | 5.633439 | -0.634228 |
| 132 | 1 | 0 | -2.655979 | 5.871318 | 0.439002  |
| 133 | 6 | 0 | -5.137339 | 3.354081 | -1.136711 |
| 134 | 1 | 0 | -3.807477 | 1.810883 | -0.475873 |
| 135 | 6 | 0 | -5.393710 | 4.726436 | -1.202425 |
| 136 | 1 | 0 | -4.699715 | 6.700391 | -0.688868 |
| 137 | 1 | 0 | -5.828240 | 2.649462 | -1.592786 |
| 138 | 1 | 0 | -6.288158 | 5.086525 | -1.704184 |

---
